# Supplementary material
Source: PubMed Central journal article supplement (PMC3890247)
Supplement: NIHMS508789-supplement-01.pdf [file NIHMS508789-supplement-01.pdf]

## Supplemental Data

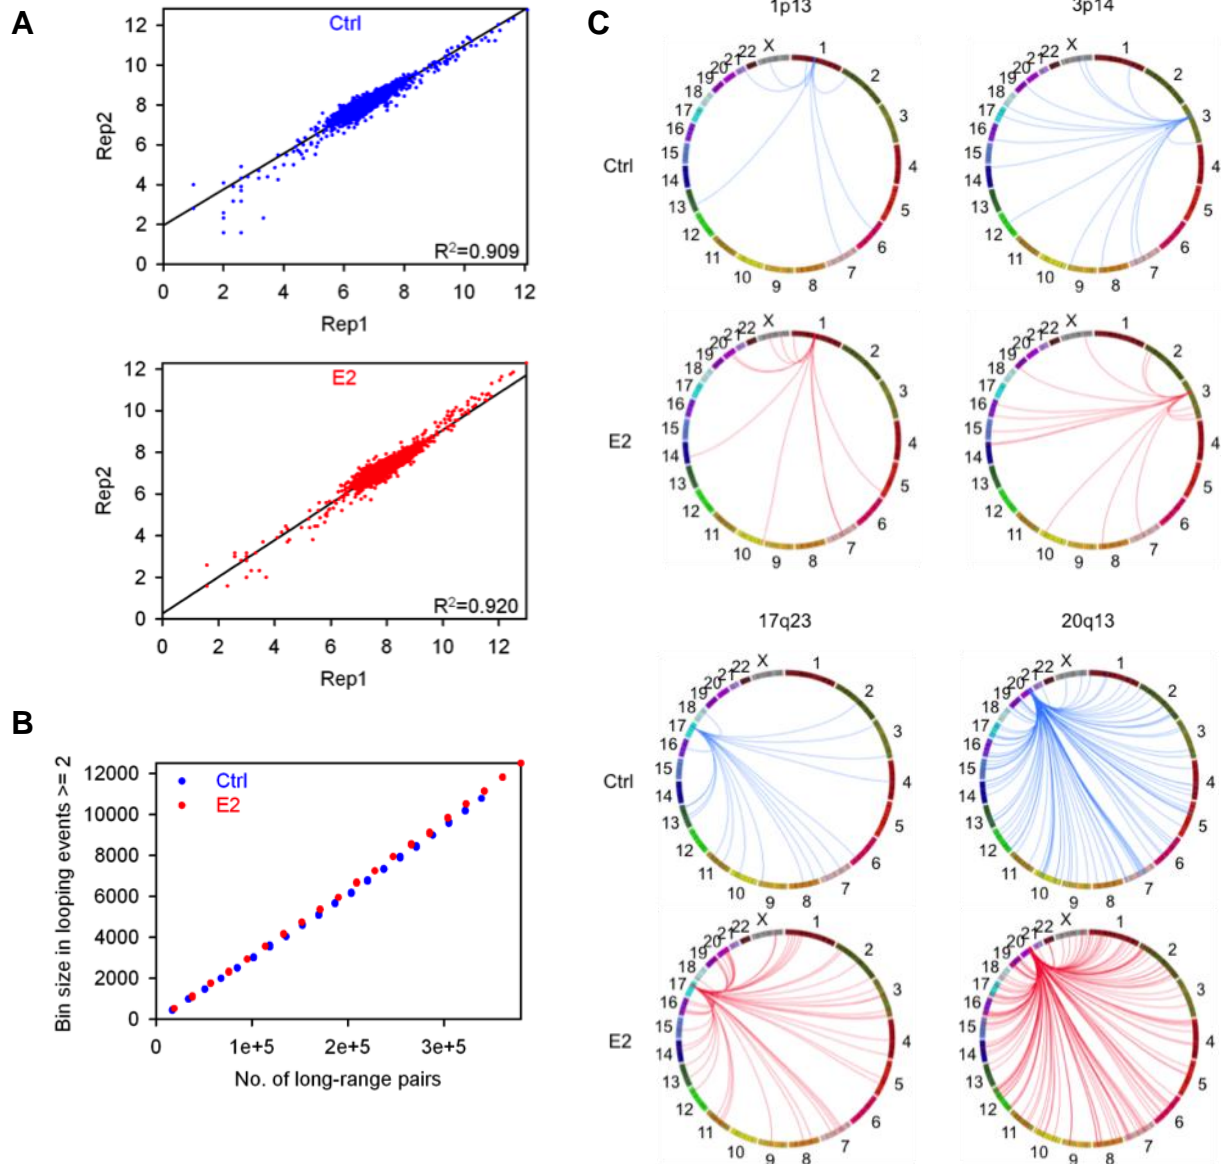

**Figure S1, related to Figure 1. Genome-wide Mapping of Chromatin Interactions by Chromosome Conformation Capture Coupled with Paired-end Sequencing (3C-seq)**

(A-B) Statistical analyses of genome-wide chromatin interactions by 3C-seq. (A) Examination of reproducibility. 3C assay coupled with paired-end sequencing was performed on two biological replicates of control (blue) and E2-treated (red) MCF-7

cells, respectively. Scatter plots were generated based on  $\log_2$ [interaction events per Mb]. The value of linear regression plots in both Ctrl ( $R^2=0.909$ ) and E2 ( $R^2=0.920$ ) datasets support the reproducibility of this approach. (B) Saturation analysis of genome-wide chromatin interaction dataset. To determine whether sequence coverage provided by 3C assay coupled with paired-end sequencing is sufficient to identify chromatin interactions in a genome-wide scale, differential reduced-scale datasets were generated by randomly extracting 5%, 10%,...,95% of the original data for determining the maxima number of positive interaction events. As shown in the plot, the maxima number of positive events was reduced following the extraction scale, indicating that this dataset is sufficient for globally screening chromatin interactions in a genome.

(C) Circular maps of clustered DERE-involved chromosomal looping upon estrogen stimulation. Chromatins looping events associated with clustered DEREs before (blue) and after (red) estrogen stimulation were depicted as circular maps using the Circos software (<http://mkweb.bcgsc.ca/circos/>). Chromosomes are individually colored for circular visualization.

**Table S1, related to Figure 1: Sequencing statistics of mapping genome-wide chromatin interactions**

| Sample                | Lane ID     | No. Reads   | *No. Aligned Reads | %          | No. Bases (Gb) | *No. Aligned Bases (Gb) | *Genome Coverage |       |
|-----------------------|-------------|-------------|--------------------|------------|----------------|-------------------------|------------------|-------|
| Ctrl                  | Rep1        | #1          | 33,240,584         | 27,607,307 | 83.05          | 1.20                    | 0.99             | 2.64X |
|                       |             | #2          | 33,383,384         | 27,386,580 | 82.04          | 1.20                    | 0.99             |       |
|                       |             | #3          | 42,681,244         | 34,176,497 | 80.07          | 1.54                    | 1.23             |       |
|                       | Rep2        | #4          | 50,718,124         | 25,788,183 | 50.85          | 1.83                    | 0.93             |       |
|                       |             | #5          | 51,813,594         | 27,938,517 | 53.92          | 1.87                    | 1.01             |       |
|                       |             | #6          | 51,956,014         | 32,354,461 | 62.27          | 1.87                    | 1.16             |       |
|                       |             | #7          | 52,971,562         | 34,359,214 | 64.86          | 1.91                    | 1.24             |       |
| Total                 | 316,764,506 | 209,610,759 | 66.17              | 11.40      | 7.55           |                         |                  |       |
| E2, 24 hr stimulation | Rep1        | #1          | 46,232,094         | 35,752,846 | 77.33          | 1.66                    | 1.29             | 3.02X |
|                       |             | #2          | 46,864,612         | 36,585,449 | 78.07          | 1.69                    | 1.32             |       |
|                       |             | #3          | 49,243,110         | 36,241,568 | 73.60          | 1.77                    | 1.30             |       |
|                       |             | #4          | 48,880,210         | 35,408,643 | 72.44          | 1.76                    | 1.27             |       |
|                       | Rep2        | #5          | 53,262,334         | 34,425,348 | 64.63          | 1.92                    | 1.24             |       |
|                       |             | #6          | 53,145,252         | 33,538,479 | 63.11          | 1.91                    | 1.21             |       |
|                       |             | #7          | 51,885,506         | 28,054,649 | 54.07          | 1.87                    | 1.01             |       |
| Total                 | 349,513,118 | 240,006,982 | 68.67              | 12.58      | 8.64           |                         |                  |       |

\*Sequences were aligned to the Human Genome Assembly (NCBI build 36.1/hg18).

**Table S2, related to Figure 1: Sensitivity Analysis by Mix Negative Binomial Distribution**

| Sample | Distance of Pairs | n.True       | n.False | ps.True | ps.False | r.True  | *Sensitivity | #FDR    |
|--------|-------------------|--------------|---------|---------|----------|---------|--------------|---------|
| 0 hr   | 1K ~ 5K           | 233624.02    | 0.64502 | 0.99999 | 0.02979  | 0.72395 | 0.77304      | 0.29084 |
|        | 5K ~ 10K          | 135930.23    | 0.37209 | 0.99998 | 0.02136  | 0.82749 | 0.78985      | 0.15101 |
|        | > 10K             | 364787061.14 | 0.00042 | 1.00000 | 0.01288  | 0.80405 | 0.71575      | 0.00048 |
|        | Inter-chromosomal | 207298.68    | 0.50442 | 0.99999 | 0.03066  | 0.78868 | 0.71201      | 0.21857 |
| 24 hr  | 1K ~ 5K           | 14915386.29  | 0.74795 | 1.00000 | 0.04145  | 0.70561 | 0.75232      | 0.31812 |
|        | 5K ~ 10K          | 2059971.42   | 0.53276 | 1.00000 | 0.03105  | 0.79897 | 0.76859      | 0.19955 |
|        | > 10K             | 873491.26    | 0.31159 | 1.00000 | 0.02156  | 0.81435 | 0.72647      | 0.15961 |
|        | Inter-chromosomal | 6329178.78   | 0.48269 | 1.00000 | 0.03042  | 0.79221 | 0.71973      | 0.20967 |

\*Sensitivity:  $\Pr(\text{counts} \geq 2 \mid \text{true signal})$ .

\*FDR:  $\Pr(\text{false signal} \mid \text{counts} \geq 2)$ .

**Table S3, related to Figure 1: Mate-pair sequencing statistics**

| Lane ID | No. Reads  | *No. Aligned Reads | %     | No. Bases (Gb) | *No. Aligned Bases (Gb) | *Genome Coverage |
|---------|------------|--------------------|-------|----------------|-------------------------|------------------|
| #1      | 75,259,850 | 55,001,116         | 73.08 | 3.84           | 2.81                    | 0.98             |
| #2      | 73,726,690 | 54,376,881         | 73.75 | 3.76           | 2.77                    | 0.97             |
| #3      | 75,375,318 | 56,094,659         | 74.42 | 3.84           | 2.86                    | 1.00             |
| #4      | 74,366,524 | 55,751,490         | 74.97 | 3.79           | 2.84                    | 0.99             |
| #5      | 75,295,422 | 56,577,933         | 75.14 | 3.84           | 2.89                    | 1.01             |
| #6      | 73,467,116 | 52,506,244         | 71.47 | 3.75           | 2.68                    | 0.94             |
| #7      | 74,246,026 | 52,839,223         | 71.17 | 3.79           | 2.69                    | 0.94             |
| #8      | 70,653,096 | 49,204,131         | 69.64 | 3.60           | 2.51                    | 0.88             |
| #9      | 72,738,184 | 51,126,582         | 70.29 | 3.71           | 2.61                    | 0.91             |
| #10     | 72,182,080 | 51,034,656         | 70.70 | 3.68           | 2.60                    | 0.91             |
| #11     | 71,516,634 | 50,583,122         | 70.73 | 3.65           | 2.58                    | 0.90             |
| #12     | 70,402,582 | 49,874,552         | 70.84 | 3.59           | 2.54                    | 0.89             |
| #13     | 71,697,496 | 50,694,766         | 70.71 | 3.66           | 2.59                    | 0.90             |
| #14     | 87,642,016 | 63,055,858         | 71.95 | 4.47           | 3.22                    | 1.13             |
| #15     | 84,604,606 | 60,202,242         | 71.16 | 4.31           | 3.07                    | 1.07             |
| #16     | 84,369,284 | 62,102,585         | 73.61 | 4.30           | 3.17                    | 1.11             |
| #17     | 83,563,498 | 61,516,634         | 73.62 | 4.26           | 3.14                    | 1.10             |
| #18     | 85,435,444 | 62,432,062         | 73.08 | 4.36           | 3.18                    | 1.11             |
| #19     | 83,459,818 | 61,416,264         | 73.59 | 4.26           | 3.13                    | 1.10             |
| #20     | 85,208,642 | 62,378,791         | 73.21 | 4.35           | 3.18                    | 1.11             |
| #21     | 81,277,408 | 59,496,934         | 73.20 | 4.15           | 3.03                    | 1.06             |
| #22     | 58,315,936 | 42,117,447         | 72.22 | 2.97           | 2.15                    | 0.75             |
| #23     | 72,529,374 | 42,979,879         | 59.26 | 3.70           | 2.19                    | 0.77             |
| #24     | 60,789,654 | 42,384,004         | 69.72 | 3.10           | 2.16                    | 0.76             |
| #25     | 60,980,534 | 45,833,205         | 75.16 | 3.11           | 2.34                    | 0.82             |
| #26     | 62,470,194 | 46,843,143         | 74.98 | 3.19           | 2.39                    | 0.84             |
| #27     | 62,543,874 | 46,922,928         | 75.02 | 3.19           | 2.39                    | 0.84             |

(continued)

| Lane ID | No. Reads     | No. Aligned Reads | %     | No. Bases (Gb) | No. Aligned Bases (Gb) | Genome Coverage |
|---------|---------------|-------------------|-------|----------------|------------------------|-----------------|
| #28     | 60,580,630    | 45,520,915        | 75.14 | 3.09           | 2.32                   | 0.81            |
| #29     | 59,508,310    | 33,288,108        | 55.94 | 3.03           | 1.70                   | 0.59            |
| #30     | 67,754,368    | 46,109,264        | 68.05 | 3.46           | 2.35                   | 0.82            |
| #31     | 68,026,638    | 46,250,965        | 67.99 | 3.47           | 2.36                   | 0.83            |
| #32     | 71,663,088    | 48,028,796        | 67.02 | 3.65           | 2.45                   | 0.86            |
| #33     | 68,637,566    | 45,841,546        | 66.79 | 3.50           | 2.34                   | 0.82            |
| #34     | 70,245,348    | 52,199,892        | 74.31 | 3.58           | 2.66                   | 0.93            |
| Total   | 2,470,533,248 | 1,762,586,817     | 71.34 | 126.00         | 89.89                  | 31.45           |

\*Sequences were aligned to the Human Genome Assembly (NCBI build 36.1/hg18).

**Table S4, related to Figure 1: List of Translocation Fusions in the MCF-7 Genome**

[Hsu-20q13 Table S4.xls](#)

**Table S5, related to Figure 1: List of Chromatin Interaction Events in Untreated  
MCF-7 Cells**

[Hsu-20q13 Table S5.xls](#)

**Table S6, related to Figure 1: List of Chromatin Interaction Events in E2-treated  
MCF-7 Cells**

[Hsu-20q13 Table S6.xls](#)

**Table S7, related to Figure 1: Statistics of ER $\alpha$  ChIP-seq in E2-treated MCF-7 Cells**

| Sample | Lane ID | No. of reads | *No. of aligned reads | %     | No. of bases (Gb) | *No. of mapped bases (Gb) |
|--------|---------|--------------|-----------------------|-------|-------------------|---------------------------|
| 0 hr   | #1      | 37,427,797   | 21,958,082            | 58.67 | 1.91              | 1.12                      |
|        | #2      | 39,554,721   | 22,039,376            | 55.72 | 2.02              | 1.12                      |
| 0.5 hr | #3      | 45,582,024   | 24,219,056            | 53.13 | 2.32              | 1.24                      |
|        | #4      | 45,235,626   | 24,449,046            | 54.05 | 2.31              | 1.25                      |
| 1 hr   | #5      | 36,727,295   | 24,953,252            | 67.94 | 1.87              | 1.27                      |
|        | #6      | 33,565,499   | 21,436,148            | 63.86 | 1.71              | 1.09                      |
| 24 hr  | #7      | 40,761,726   | 24,546,099            | 60.22 | 2.08              | 1.25                      |
|        | #8      | 40,241,912   | 24,239,655            | 60.23 | 2.05              | 1.24                      |

\*Sequences were aligned to the Human Genome Assembly (NCBI build 36.1/hg18).



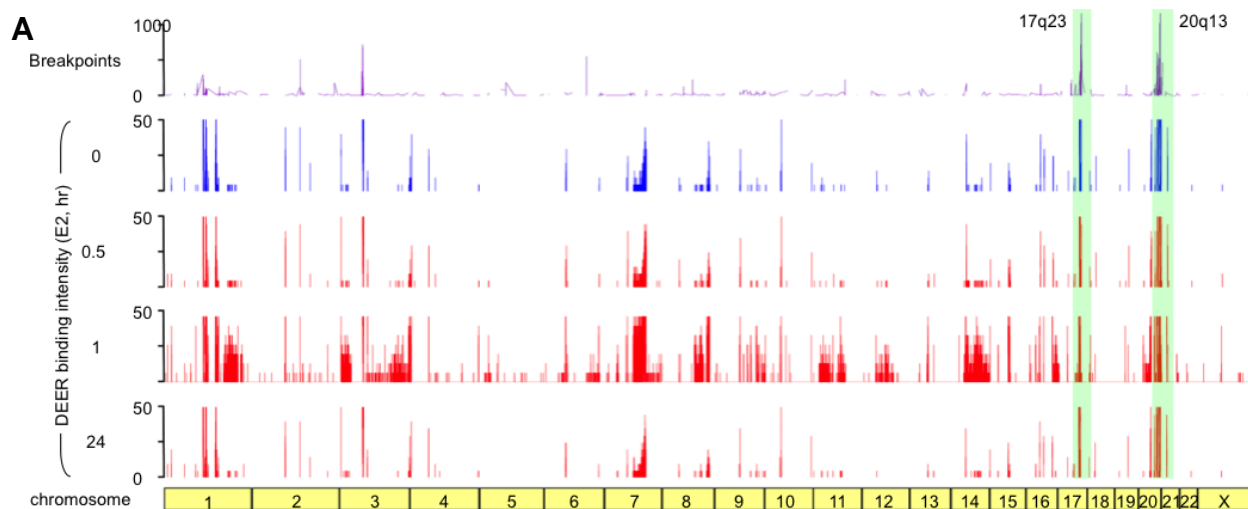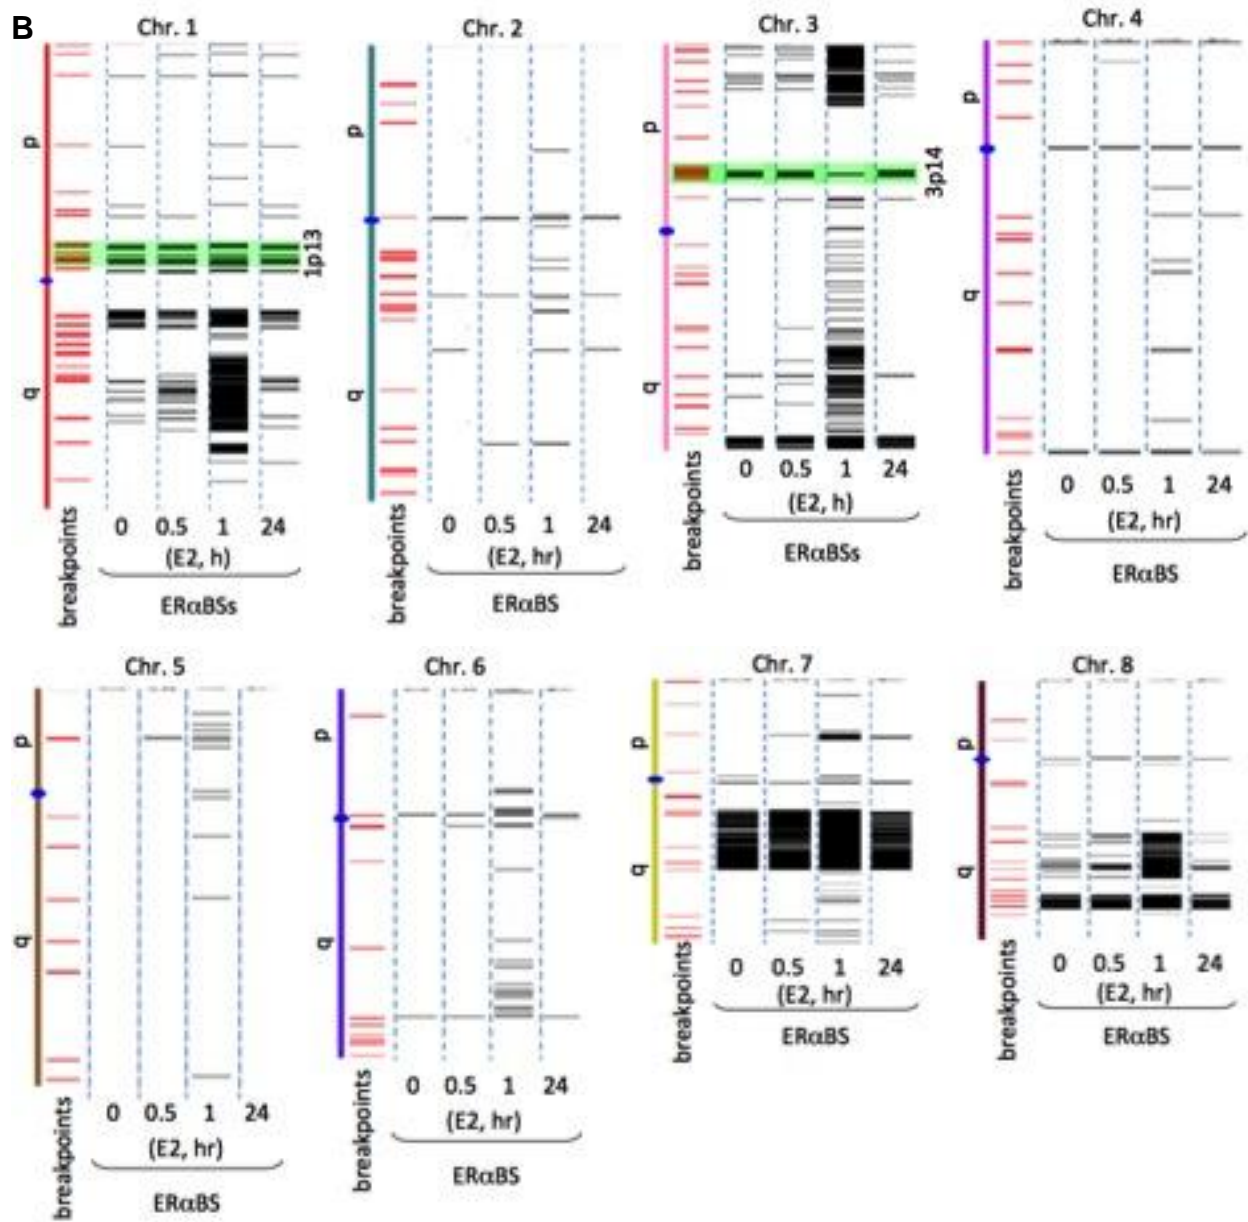

B (continued)

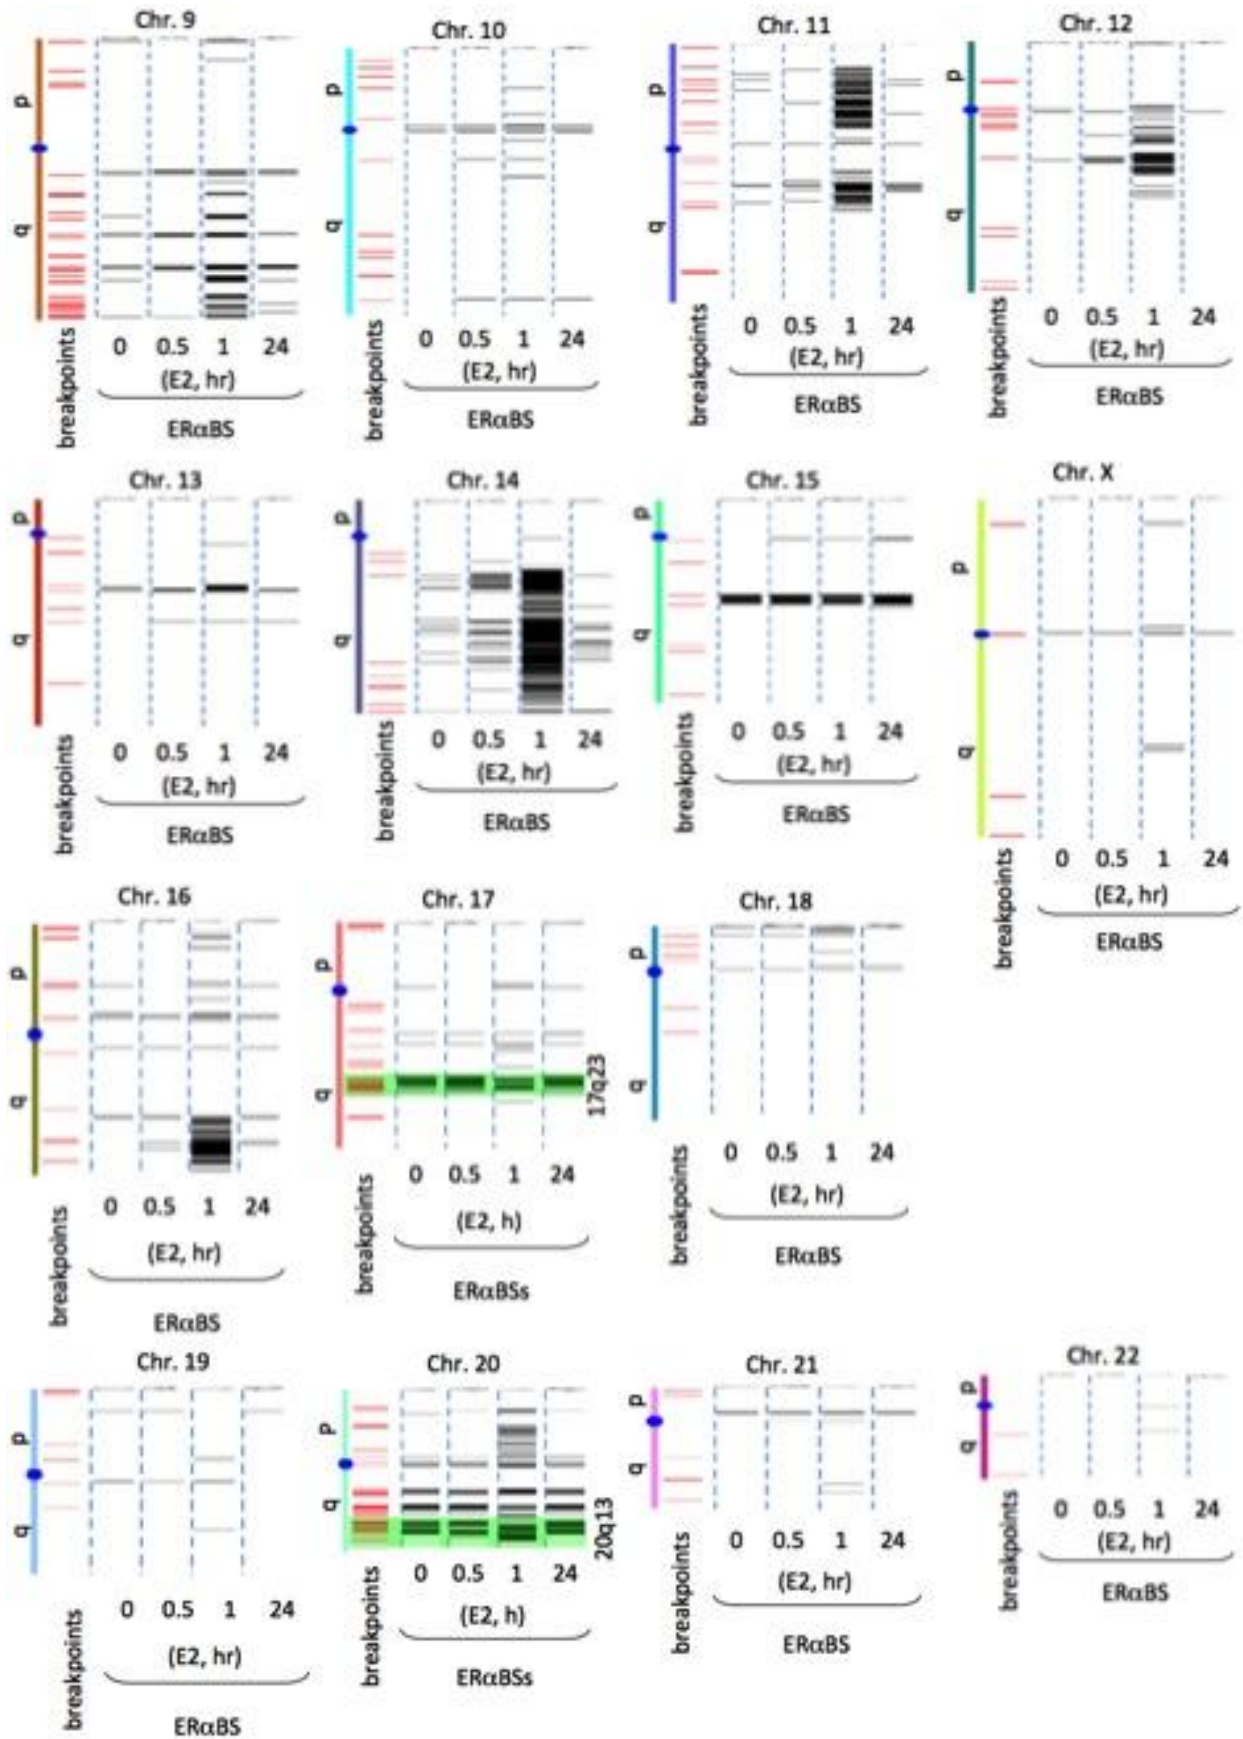

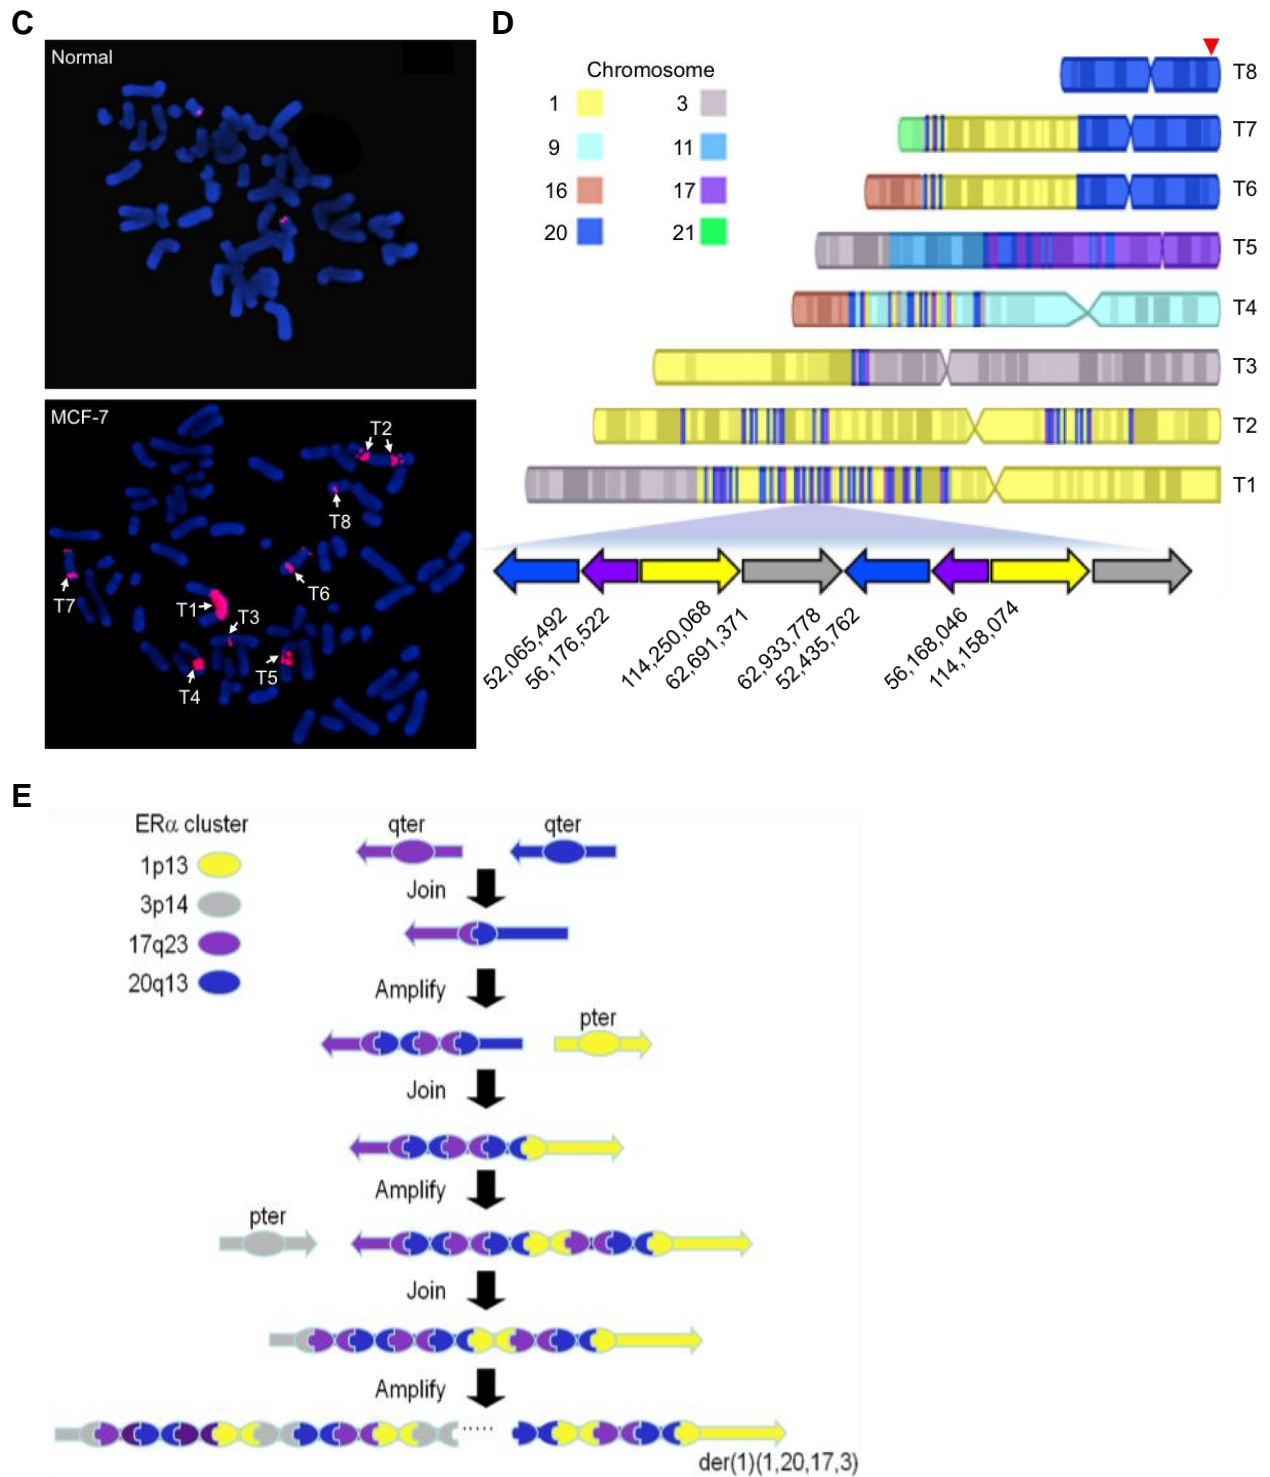

**Figure S2, related to Figure 2. Genomic Location of DEREs and Translocation Breakpoint Sites in MCF-7 Cells**

(A-B) Genomic distribution of DEREs and translocation breakpoints in MCF-7 cells.

Mate-pair sequencing was conducted to explore breakpoint sites of translocations across the MCF-7 genome. Charcoal-stripped MCF-7 cells were stimulated with E2 (70 nM) in four time points (0, 0.5, 1, and 24 hr) and then subjected to ER $\alpha$  ChIP-seq (see also Table S7). (A) Genome-wide location map. Fusion frequencies of breakpoint sites were plotted in purple and binding intensities of DERE in blue (untreated) and red (E2-treated). Green highlighted regions indicated co-localization of breakpoint clusters and densely ER $\alpha$ -bound DERE regions. (B) Distribution maps of DEREs and breakpoints in individual chromosomes. The maximum binding events is found at 1 hr of stimulation. Pre-existing binding of ER $\alpha$  is observed in some chromosome regions prior to estrogen stimulation, consistent with previous reports (Carroll et al., 2006; Lupien et al., 2010). Increased binding intensities events of these regions were observed within 24 hr of stimulation.

(C-E) Proposed Model of DERE-DERE fusions and amplification. (C) Metaphase FISH analysis of 20q13 DERE region in normal breast epithelial cells (*upper*) and MCF-7 cancer cells (*lower*). Arrowheads indicate eight derivative chromosomes, T1 to T8. (D) Translocation patterns of 20q13 DERE region in derivative chromosomes, reconstructed based on mate-pair sequencing data. Using the T1 derivative chromosome as an example, densely ER $\alpha$ -bound DERE regions were fused and amplified as a concatenate unit (20q13-17q23-1p13-3p14) (*lower*). A putative deletion as shown in red triangle was found in Chromosome 20 (T8). (E) Proposed 20q13-17q23 DEREs as a unit participating in DERE-DERE fusions and amplification. Based on mate-pair sequencing data and metaphase FISH results, amplification events of 20q13 and 17q23 DERE regions occurred more frequently than other amplified regions, and the junctures

between 20q13 and 17q23 segments were the most common events observed in MCF-7 cells (see also Figure 2C). Therefore, it is assumed that rearrangements in the MCF7 genome aberrantly started from the fusion fragments between 20q13 and 17q23 DERE regions. After a few steps of amplification, part of this region is translocated onto chromosome 1 and fused with 1p13. Subsequently, the short arm of chromosome 3 joins this the amplification. The rearranged chromosome T1 (see Figure S2D) is derived from multiple steps of amplification and translocation.

**Table S8, related to Figure 2: Genomic Characteristics of 17q23 and 20q13 DEREs**

| Chromosome Region | Coordinates                 | Length (Mb) | Breakpoints (No. per Mb) | No. ER $\alpha$ Binding Sites (No. per Mb) |             | Chromatin Loops |     |        |
|-------------------|-----------------------------|-------------|--------------------------|--------------------------------------------|-------------|-----------------|-----|--------|
|                   |                             |             |                          | Ctrl                                       | E2          | Ctrl            | E2  | Common |
| 17q23             | chr17:55,268,000-59,758,000 | 4.49        | 46 (10.24)               | 81 (18.04)                                 | 207 (46.10) | 68              | 98  | 29     |
| 20q13             | chr20:42,060,000-61,180,000 | 19.12       | 98 (5.13)                | 328 (17.15)                                | 974 (50.94) | 174             | 242 | 65     |

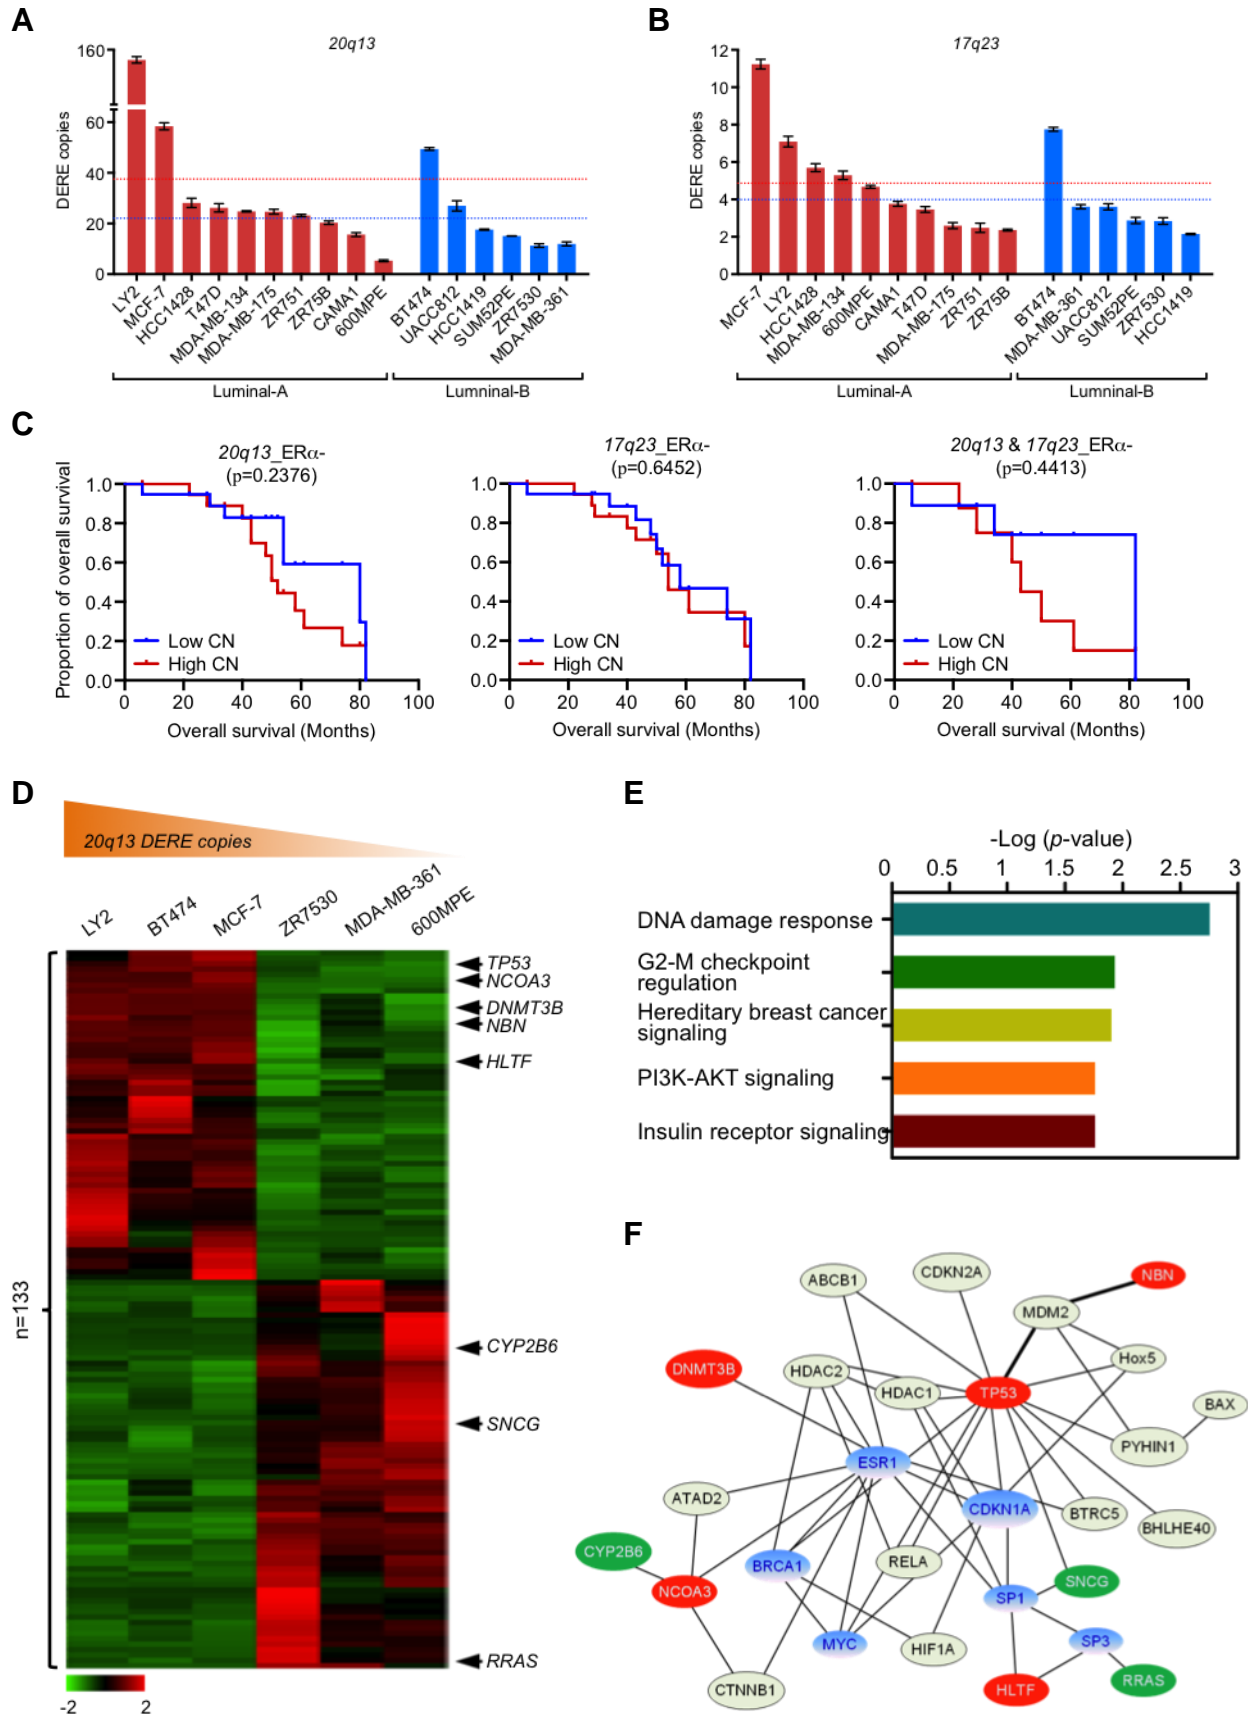

**Figure S3, related to Figure 4. Amplified DEREs are Profoundly Observed in ER $\alpha$ -positive Breast Cancers and Association of TP53-involved Signaling Network in 20q13 DERE Amplification**

(A-B) Copy-number variation of 20q13 and 17q23 DEREs in ER $\alpha$ -positive breast cancer cell lines. Histograms depicting copy-number variation of 20q13 (A) and 17q23 (B) DEREs in ER $\alpha$ -positive breast cancer cell lines (n=16) were plotted with individual cell lines and categorized into two groups based on subtypes (Heiser et al., 2009). Mean values of DERE copies in two groups were shown in dashed lines. Red, Luminal-A; Blue, Luminal-B.

(C) Correlation between amplified DERE copies and overall survival of ER $\alpha$ -negative breast cancer patients. Kaplan-Meier survival curves of ER $\alpha$ -negative breast cancer patients (n=19) harboring either high (n>2) or low CN (n<2) of the 20q13 (*left*) or 17q23 (*middle*) or both (*right*) DEREs. Wilcoxon test was used to determine statistical significance.

(D-F) Association of TP53-involved signaling network in 20q13 DERE amplification. (D) Heat map of 133 differentially expressed genes in three ER $\alpha$ -positive cell lines (LY2, BT-474, and MCF-7) with high CN (n>50) *versus* three low-CN (n<15) cell lines (600MPE, MDA-MB-361, and ZR-7530). Arrow heads, genes involved in the identified TP53/BRCA1-associated signaling network (see Figure S3F). (E) The Ingenuity Pathway Analysis (IPA) version 8.8 (Ingenuity Systems, <http://www.ingenuity.com>) was used to identify different signaling networks. The aforementioned 133 differentially expressed genes were subjected to and eligible for the analysis (see also Table S9). (F) IPA was applied to determine networks associated with DNA break-repair



mechanisms. The results indicated that five up-regulated (red ovals) and three down-regulated (green ovals) genes were significantly involved in TP53/BRCA1-associated signaling network ( $p=0.00743$ )

**Table S9, related to Figure 4: Differentially Expressed Genes Associated with 20q13 DERE Copy Variation**

| Gene             | Description                                                              | Cellular Location   |
|------------------|--------------------------------------------------------------------------|---------------------|
| <i>ABCC4</i>     | ATP-binding cassette, sub-family C (CFTR/MRP), member 4                  | Plasma Membrane     |
| <i>ABLIM1</i>    | actin binding LIM protein 1                                              | Cytoplasm           |
| <i>ADAMTSL3</i>  | ADAMTS-like 3                                                            | unknown             |
| <i>APOL1</i>     | apolipoprotein L, 1                                                      | Extracellular Space |
| <i>ARAP2</i>     | ArfGAP with RhoGAP domain, ankyrin repeat and PH domain 2                | Cytoplasm           |
| <i>ARL6IP5</i>   | ADP-ribosylation-like factor 6 interacting protein 5                     | Cytoplasm           |
| <i>ASNS</i>      | asparagine synthetase (glutamine-hydrolyzing)                            | unknown             |
| <i>ATP8A1</i>    | ATPase, aminophospholipid transporter (APLT), class I, type 8A, member 1 | Cytoplasm           |
| <i>AZGP1</i>     | alpha-2-glycoprotein 1, zinc-binding                                     | Extracellular Space |
| <i>BASP1</i>     | brain abundant, membrane attached signal protein 1                       | Plasma Membrane     |
| <i>BMP7</i>      | bone morphogenetic protein 7                                             | Extracellular Space |
| <i>C10ORF81</i>  | chromosome 10 open reading frame 81                                      | unknown             |
| <i>C1ORF59</i>   | chromosome 1 open reading frame 59                                       | unknown             |
| <i>C20ORF114</i> | chromosome 20 open reading frame 114                                     | Extracellular Space |
| <i>C20ORF95</i>  | Rho GTPase activating protein 40                                         | unknown             |
| <i>C2ORF54</i>   | chromosome 2 open reading frame 54                                       | unknown             |
| <i>C4ORF19</i>   | chromosome 4 open reading frame 19                                       | unknown             |
| <i>CALD1</i>     | caldesmon 1                                                              | Cytoplasm           |
| <i>CAPN9</i>     | calpain 9                                                                | Cytoplasm           |
| <i>CCNG1</i>     | cyclin G1                                                                | Nucleus             |
| <i>CDC25B</i>    | cell division cycle 25 homolog B ( <i>S. pombe</i> )                     | Nucleus             |
| <i>CLN5</i>      | ceroid-lipofuscinosis, neuronal 5                                        | Cytoplasm           |
| <i>CYBRD1</i>    | cytochrome b reductase 1                                                 | Cytoplasm           |
| <i>CYP2B6</i>    | cytochrome P450, family 2, subfamily B, polypeptide 6                    | Cytoplasm           |
| <i>CYR61</i>     | cysteine-rich, angiogenic inducer, 61                                    | Extracellular Space |
| <i>DAK</i>       | dihydroxyacetone kinase 2 homolog ( <i>S. cerevisiae</i> )               | unknown             |
| <i>DCAF4</i>     | DDB1 and CUL4 associated factor 4                                        | unknown             |
| <i>DHCR7</i>     | 7-dehydrocholesterol reductase                                           | Cytoplasm           |
| <i>DNAJB4</i>    | DnaJ (Hsp40) homolog, subfamily B, member 4                              | Nucleus             |
| <i>DNAJC6</i>    | DnaJ (Hsp40) homolog, subfamily C, member 6                              | Cytoplasm           |
| <i>DNALI1</i>    | dynein, axonemal, light intermediate chain 1                             | Cytoplasm           |

(continued)

| Gene            | Description                                                               | Cellular Location   |
|-----------------|---------------------------------------------------------------------------|---------------------|
| <i>DNMT3B</i>   | DNA (cytosine-5-)-methyltransferase 3 beta                                | Nucleus             |
| <i>DOCK3</i>    | dedicator of cytokinesis 3                                                | Cytoplasm           |
| <i>DUS4L</i>    | dihydrouridine synthase 4-like ( <i>S. cerevisiae</i> )                   | unknown             |
| <i>EGF</i>      | epidermal growth factor                                                   | Extracellular Space |
| <i>ELP2</i>     | elongation protein 2 homolog ( <i>S. cerevisiae</i> )                     | Cytoplasm           |
| <i>EPHB4</i>    | EPH receptor B4                                                           | Plasma Membrane     |
| <i>FADS1</i>    | fatty acid desaturase 1                                                   | Plasma Membrane     |
| <i>FAM114A1</i> | family with sequence similarity 114, member A1                            | unknown             |
| <i>FAT1</i>     | FAT tumor suppressor homolog 1 ( <i>Drosophila</i> )                      | Plasma Membrane     |
| <i>FMOD</i>     | fibromodulin                                                              | Extracellular Space |
| <i>GATM</i>     | glycine amidinotransferase (L-arginine:glycine amidinotransferase)        | Cytoplasm           |
| <i>GBP2</i>     | guanylate binding protein 2, interferon-inducible                         | Cytoplasm           |
| <i>GBP3</i>     | guanylate binding protein 3                                               | Cytoplasm           |
| <i>GCH1</i>     | GTP cyclohydrolase 1                                                      | Cytoplasm           |
| <i>GCLM</i>     | glutamate-cysteine ligase, modifier subunit                               | Cytoplasm           |
| <i>GCNT2</i>    | glucosaminyl (N-acetyl) transferase 2, I-branching enzyme (I blood group) | Cytoplasm           |
| <i>GPR180</i>   | G protein-coupled receptor 180                                            | unknown             |
| <i>GPR98</i>    | G protein-coupled receptor 98                                             | Plasma Membrane     |
| <i>HEATR6</i>   | HEAT repeat containing 6                                                  | unknown             |
| <i>HES1</i>     | hairy and enhancer of split 1, ( <i>Drosophila</i> )                      | Nucleus             |
| <i>HFE</i>      | hemochromatosis                                                           | Plasma Membrane     |
| <i>HLTF</i>     | helicase-like transcription factor                                        | Nucleus             |
| <i>HNRNPAB</i>  | heterogeneous nuclear ribonucleoprotein A/B                               | Nucleus             |
| <i>IL20RA</i>   | interleukin 20 receptor, alpha                                            | Plasma Membrane     |
| <i>INPPL1</i>   | inositol polyphosphate phosphatase-like 1                                 | Cytoplasm           |
| <i>KCNS3</i>    | potassium voltage-gated channel, delayed-rectifier, subfamily S, member 3 | Plasma Membrane     |
| <i>LGALS3BP</i> | lectin, galactoside-binding, soluble, 3 binding protein                   | Plasma Membrane     |
| <i>LMO7</i>     | LIM domain 7                                                              | Cytoplasm           |
| <i>LPGAT1</i>   | lysophosphatidylglycerol acyltransferase 1                                | Cytoplasm           |
| <i>LXN</i>      | latexin                                                                   | Cytoplasm           |
| <i>MAPT</i>     | microtubule-associated protein tau                                        | Cytoplasm           |
| <i>MMRN2</i>    | multimerin 2                                                              | Extracellular Space |

(continued)

| Gene            | Description                                                       | Cellular Location   |
|-----------------|-------------------------------------------------------------------|---------------------|
| <i>MOCS3</i>    | molybdenum cofactor synthesis 3                                   | Cytoplasm           |
| <i>MST1R</i>    | macrophage stimulating 1 receptor (c-met-related tyrosine kinase) | Plasma Membrane     |
| <i>NBN</i>      | nibrin                                                            | Nucleus             |
| <i>NCOA3</i>    | nuclear receptor coactivator 3                                    | Nucleus             |
| <i>NTN4</i>     | netrin 4                                                          | Extracellular Space |
| <i>ORC5L</i>    | origin recognition complex, subunit 5-like (yeast)                | Nucleus             |
| <i>PARD6B</i>   | par-6 partitioning defective 6 homolog beta ( <i>C. elegans</i> ) | Plasma Membrane     |
| <i>PCK2</i>     | phosphoenolpyruvate carboxykinase 2 (mitochondrial)               | Cytoplasm           |
| <i>PDGFRL</i>   | platelet-derived growth factor receptor-like                      | Plasma Membrane     |
| <i>PFDN4</i>    | prefoldin subunit 4                                               | Cytoplasm           |
| <i>PLCE1</i>    | phospholipase C, epsilon 1                                        | Cytoplasm           |
| <i>PLS3</i>     | plastin 3                                                         | Cytoplasm           |
| <i>PMPCB</i>    | peptidase (mitochondrial processing) beta                         | Cytoplasm           |
| <i>PNMA1</i>    | paraneoplastic antigen MA1                                        | Nucleus             |
| <i>PNPLA8</i>   | patatin-like phospholipase domain containing 8                    | Cytoplasm           |
| <i>PPP1R3C</i>  | protein phosphatase 1, regulatory (inhibitor) subunit 3C          | Cytoplasm           |
| <i>PRMT6</i>    | protein arginine methyltransferase 6                              | Nucleus             |
| <i>PRTG</i>     | protogenin                                                        | unknown             |
| <i>PSCA</i>     | prostate stem cell antigen                                        | Plasma Membrane     |
| <i>PSMG1</i>    | proteasome (prosome, macropain) assembly chaperone 1              | Plasma Membrane     |
| <i>PTCD1</i>    | pentatricopeptide repeat domain 1                                 | unknown             |
| <i>PUS7</i>     | pseudouridylate synthase 7 homolog ( <i>S. cerevisiae</i> )       | unknown             |
| <i>RINT1</i>    | RAD50 interactor 1                                                | Nucleus             |
| <i>RNASEH2A</i> | ribonuclease H2, subunit A                                        | Nucleus             |
| <i>RNF217</i>   | ring finger protein 217                                           | unknown             |
| <i>RPP40</i>    | ribonuclease P/MRP 40kDa subunit                                  | Nucleus             |
| <i>RPS6KB1</i>  | ribosomal protein S6 kinase, 70kDa, polypeptide 1                 | Cytoplasm           |
| <i>RRAS</i>     | related RAS viral (r-ras) oncogene homolog                        | Cytoplasm           |
| <i>SCGB1D2</i>  | secretoglobin, family 1D, member 2                                | Extracellular Space |
| <i>SCGB2A2</i>  | secretoglobin, family 2A, member 2                                | Extracellular Space |
| <i>SCNN1A</i>   | sodium channel, nonvoltage-gated 1 alpha                          | Plasma Membrane     |
| <i>SGCE</i>     | sarcoglycan, epsilon                                              | Plasma Membrane     |

(continued)

| Gene           | Description                                                                 | Cellular Location   |
|----------------|-----------------------------------------------------------------------------|---------------------|
| <i>SIM2</i>    | single-minded homolog 2 (Drosophila)                                        | Nucleus             |
| <i>SLC15A2</i> | solute carrier family 15 (H+/peptide transporter), member 2                 | Plasma Membrane     |
| <i>SLC41A2</i> | solute carrier family 41, member 2                                          | unknown             |
| <i>SLC44A3</i> | solute carrier family 44, member 3                                          | unknown             |
| <i>SLC44A5</i> | solute carrier family 44, member 5                                          | unknown             |
| <i>SLC46A3</i> | solute carrier family 46, member 3                                          | Extracellular Space |
| <i>SNCG</i>    | synuclein, gamma (breast cancer-specific protein 1)                         | Cytoplasm           |
| <i>SNX10</i>   | sorting nexin 10                                                            | Cytoplasm           |
| <i>SPATA2</i>  | spermatogenesis associated 2                                                | Extracellular Space |
| <i>STAT6</i>   | signal transducer and activator of transcription 6, interleukin-4 induced   | Nucleus             |
| <i>STC2</i>    | stanniocalcin 2                                                             | Extracellular Space |
| <i>STX16</i>   | syntaxin 16                                                                 | Cytoplasm           |
| <i>SUSD2</i>   | sushi domain containing 2                                                   | Extracellular Space |
| <i>TCEAL8</i>  | transcription elongation factor A (SII)-like 8                              | unknown             |
| <i>TFAP2B</i>  | transcription factor AP-2 beta (activating enhancer binding protein 2 beta) | Nucleus             |
| <i>THOC3</i>   | THO complex 3                                                               | Nucleus             |
| <i>TLR1</i>    | toll-like receptor 1                                                        | Plasma Membrane     |
| <i>TLR3</i>    | toll-like receptor 3                                                        | Plasma Membrane     |
| <i>TMCO3</i>   | transmembrane and coiled-coil domains 3                                     | unknown             |
| <i>TMEM40</i>  | transmembrane protein 40                                                    | unknown             |
| <i>TMPRSS3</i> | transmembrane protease, serine 3                                            | Plasma Membrane     |
| <i>TNFSF10</i> | tumor necrosis factor (ligand) superfamily, member 10                       | Extracellular Space |
| <i>TLR1</i>    | toll-like receptor 1                                                        | Plasma Membrane     |
| <i>TLR3</i>    | toll-like receptor 3                                                        | Plasma Membrane     |
| <i>TMCO3</i>   | transmembrane and coiled-coil domains 3                                     | unknown             |
| <i>TMEM40</i>  | transmembrane protein 40                                                    | unknown             |
| <i>TMPRSS3</i> | transmembrane protease, serine 3                                            | Plasma Membrane     |
| <i>TNFSF10</i> | tumor necrosis factor (ligand) superfamily, member 10                       | Extracellular Space |
| <i>TNFSF15</i> | tumor necrosis factor (ligand) superfamily, member 15                       | Extracellular Space |
| <i>TP53</i>    | tumor protein p53                                                           | Nucleus             |
| <i>TPST1</i>   | tyrosylprotein sulfotransferase 1                                           | Cytoplasm           |
| <i>TRIM29</i>  | tripartite motif-containing 29                                              | Cytoplasm           |

(continued)

| Gene           | Description                                      | Cellular Location |
|----------------|--------------------------------------------------|-------------------|
| <i>TRIM38</i>  | tripartite motif-containing 38                   | unknown           |
| <i>TSPYL5</i>  | <i>TSPY-like 5</i>                               | <i>unknown</i>    |
| <i>VHL</i>     | <i>von Hippel-Lindau tumor suppressor</i>        | <i>Nucleus</i>    |
| <i>WBP5</i>    | <i>WW domain binding protein 5</i>               | <i>unknown</i>    |
| <i>ZFP37</i>   | <i>zinc finger protein 37 homolog (mouse)</i>    | <i>Nucleus</i>    |
| <i>ZNF114</i>  | <i>zinc finger protein 114</i>                   | <i>unknown</i>    |
| <i>ZNF425</i>  | <i>zinc finger protein 425</i>                   | <i>unknown</i>    |
| <i>ZNF75A</i>  | <i>zinc finger protein 75a</i>                   | <i>Nucleus</i>    |
| <i>ZNF786</i>  | <i>zinc finger protein 786</i>                   | <i>Nucleus</i>    |
| <i>ZSCAN21</i> | <i>zinc finger and SCAN domain containing 21</i> | <i>Nucleus</i>    |

A

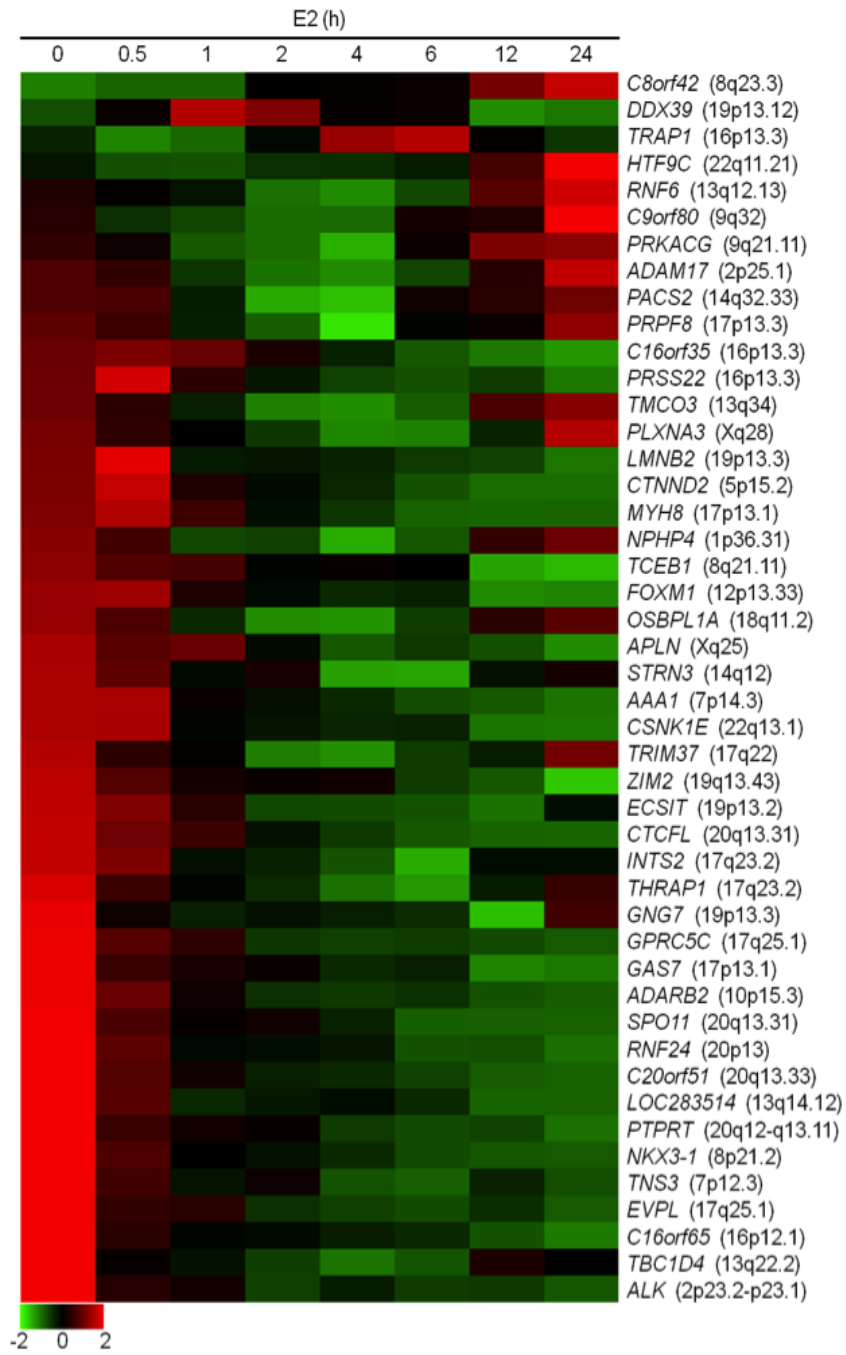

**B**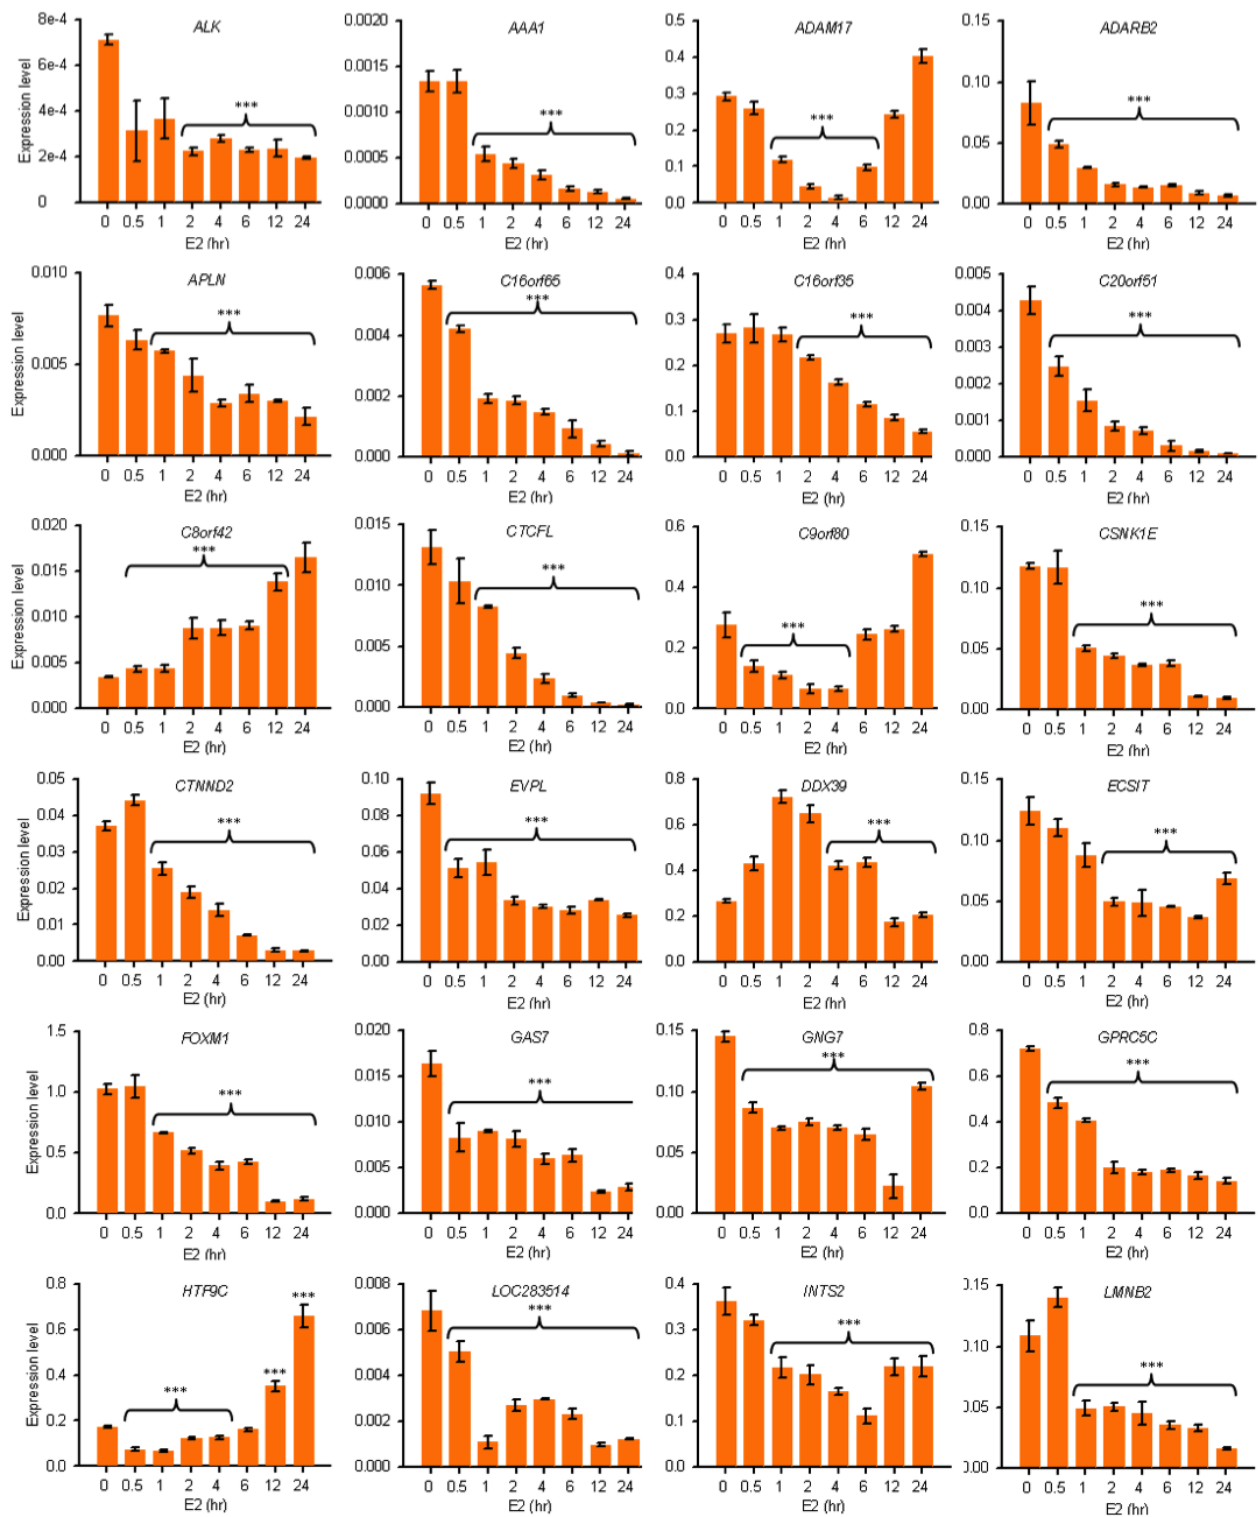



## B (continued)

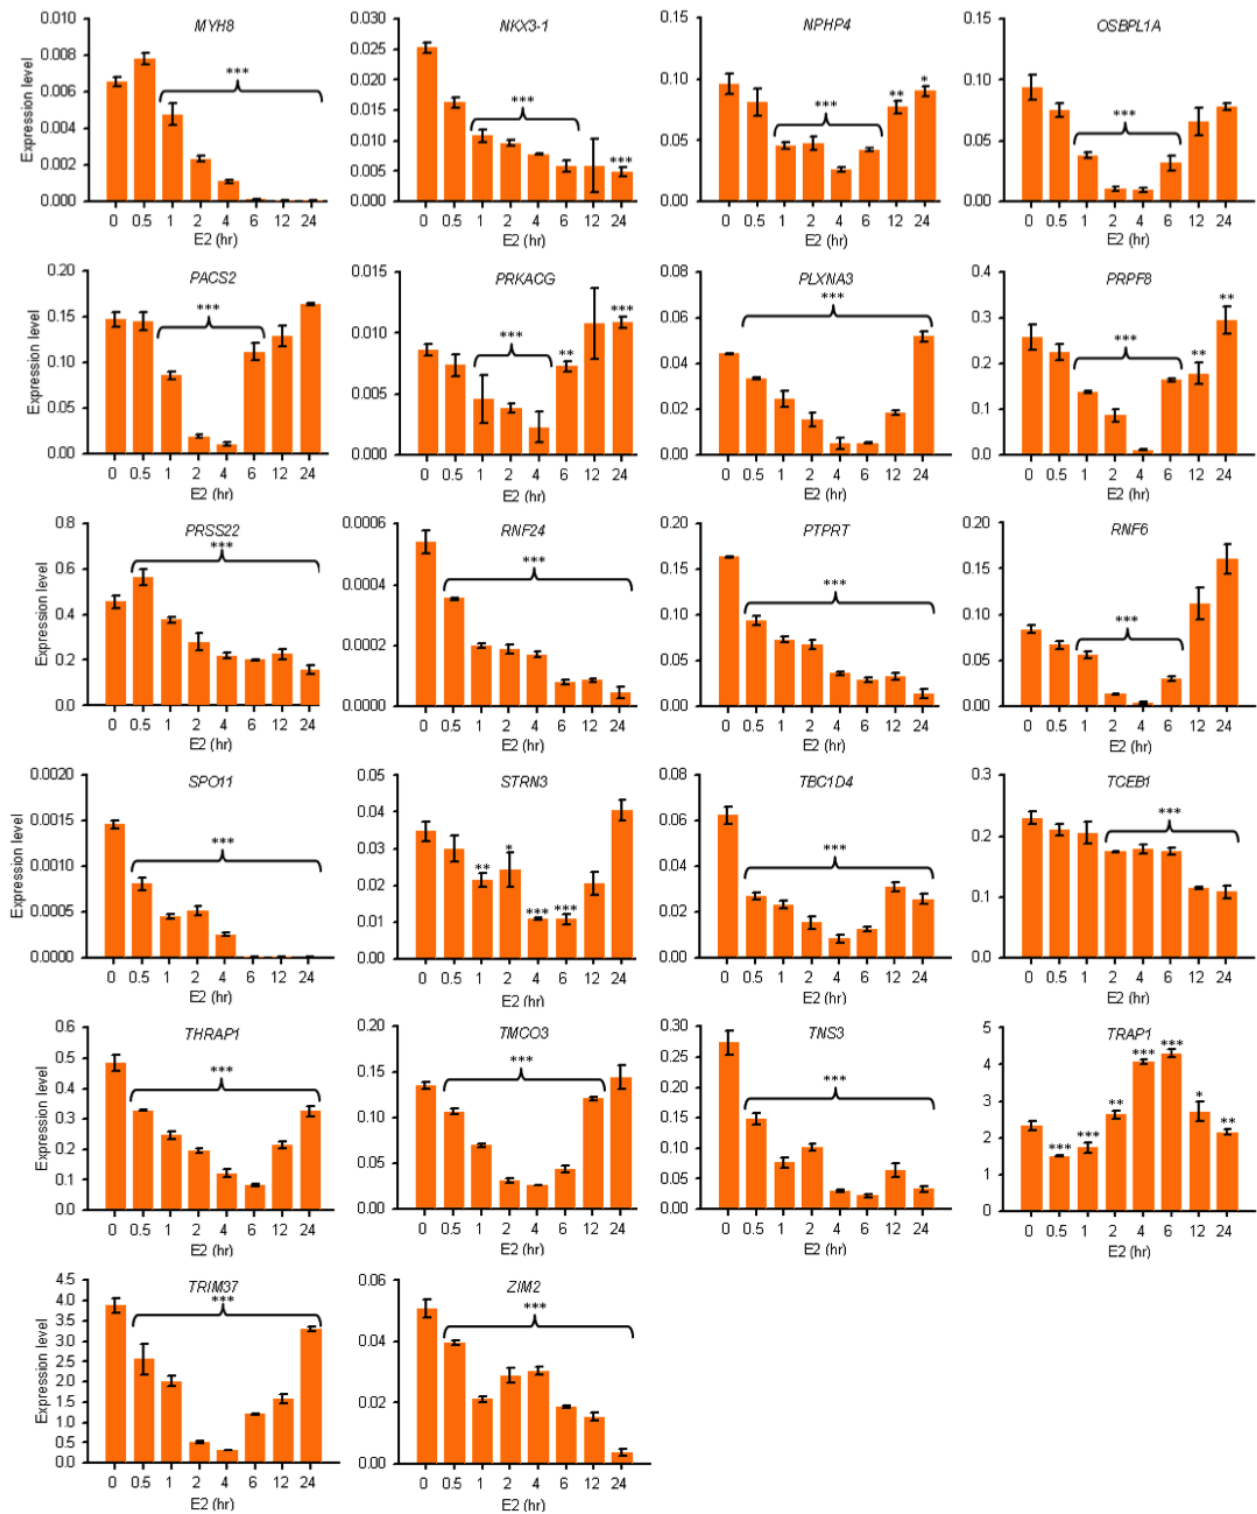

**C**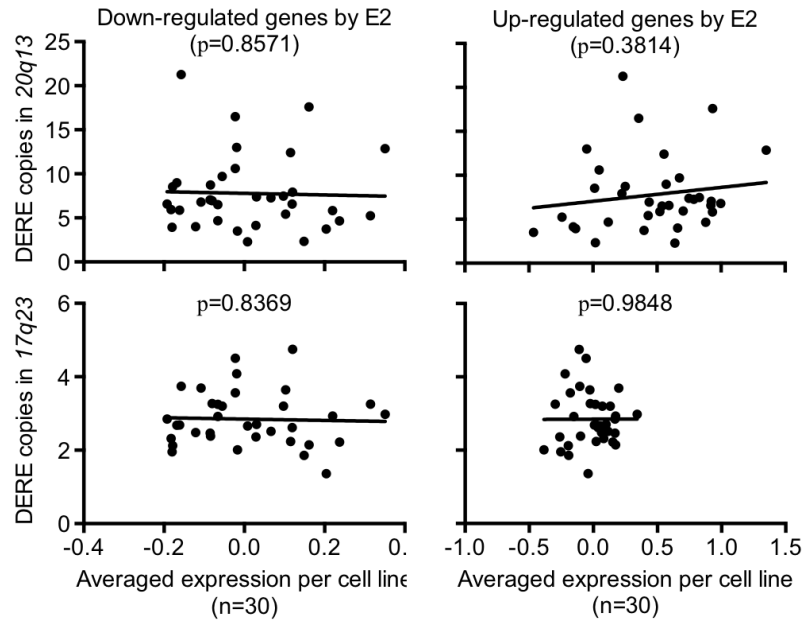

**Figure S4, related to Figure 5. Expression Analysis of 46 Target Genes**

**Interacting with 20q13 DEREs and Correlation Analysis of DERE Copy Changes and DERE-regulated Target Gene Expression in ER $\alpha$ -negative Breast Cancer Cell Lines**

(A-B) Quantitative RT-PCR analysis was performed on MCF-7 cells treated with E2 (70 nM) in eight time periods (0, 0.5, 1, 2, 4, 6, 12, and 24 hr). Data were summarized in a heat map (A) and shown in 46 bar charts (B) with individual genes. Mean  $\pm$  SD (n=6).

\*\*\*,  $p < 0.001$ ; \*\*,  $p < 0.01$ ; \*,  $p < 0.05$  (Student's *t* test), comparing to control cells (time point "0").

(C) Expression microarray data of ICBP cell lines (Heiser et al., 2009) was integrated with experimental copy-number results of 20q13 and 17q23 DEREs to study the correlation between DERE amplification and transcription control in ER $\alpha$ -negative breast cancer cell lines (n=30).

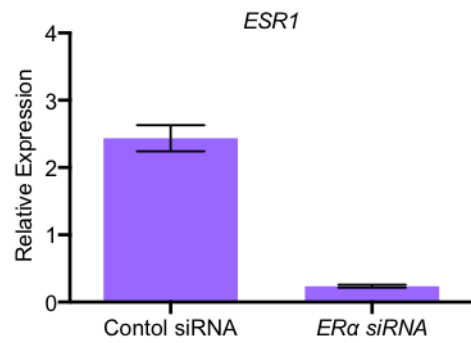

**Figure S5, related to Figure 6. Quantitative RT-PCR Analysis of *ESR1* Expression in MCF-7 Transfectants**

After transient transfection of either ER $\alpha$  siRNA or scramble siRNA (Control siRNA) into MCF-7 cells, total RNA was collected for expression analysis.

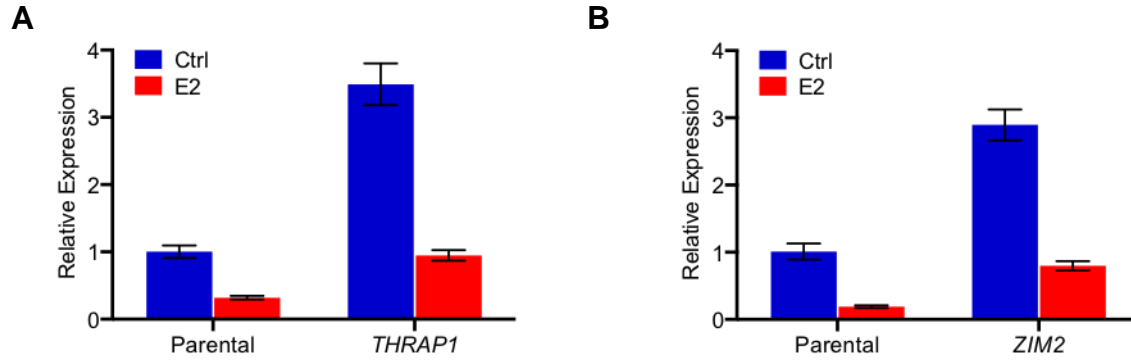

**Figure S6, related to Figure 7. Quantitative RT-PCR Analysis of *THRAP1* and *ZIM2* Expression in MCF-7 Transfectants**

After transient transfection of *THRAP1* (A) or *ZIM2* (B) plasmids into MCF-7 cells, total RNA from both untreated and E2-treated (24hr) cells was collected and then subjected to quantitative RT-PCR analysis.

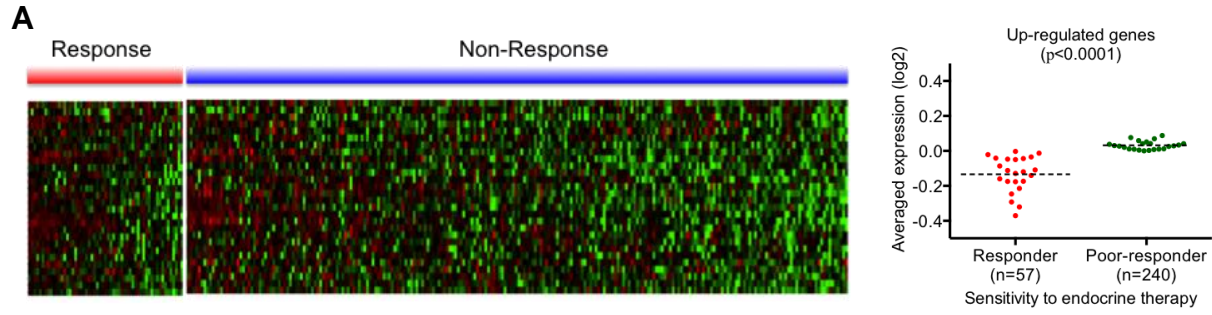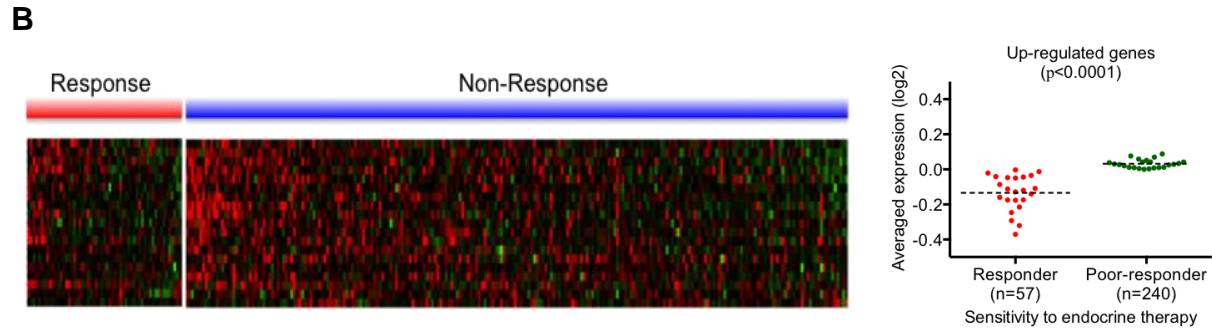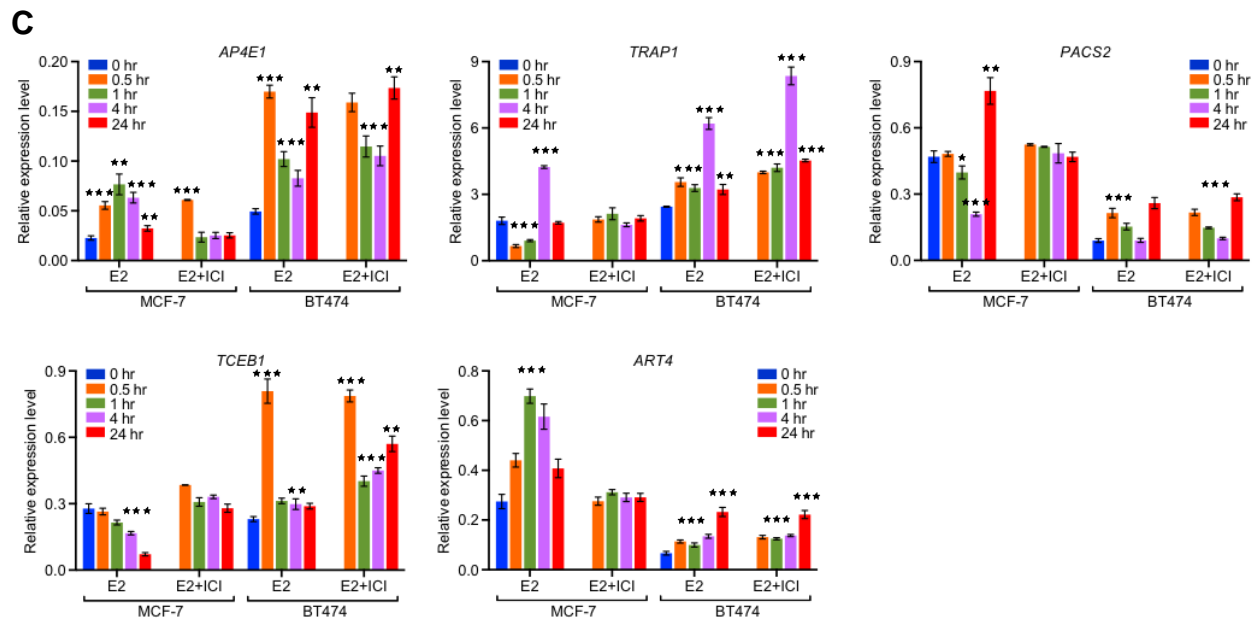

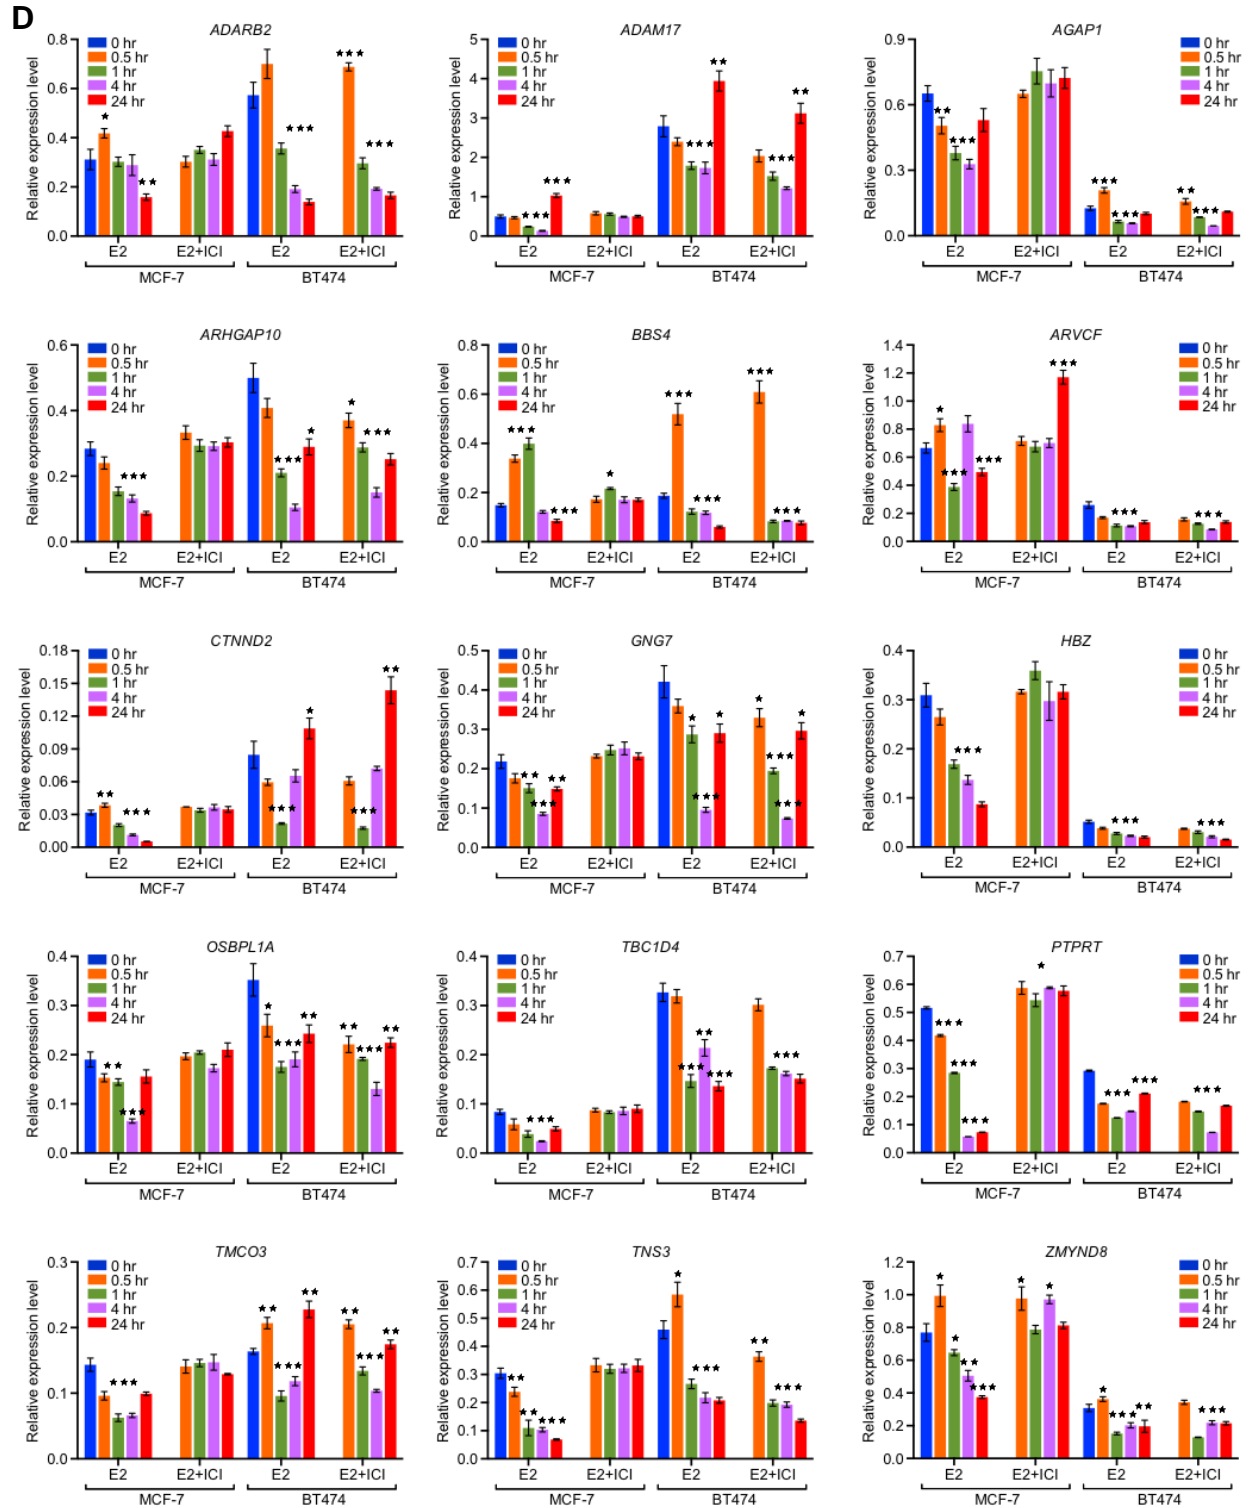

**Figure S7, related to Figure 8. Expression Signature of DERE-interacting Genes Correlates with Relapse after Hormone Therapy**

(A-B) Expression signature of DERE-interacting targets is associated with relapse after endocrine therapy. A case-control breast tumor cohort was applied to interrogate whether the gene signature identified in Figure 8A-B is associated with the resistant response of patients after endocrine therapy. This cohort (n=508) comprises of 439 patients with low-sensitivity to endocrine therapy and 69 with either high- or intermediate-sensitivity to treatment (Hatzis et al., 2011). Expression profiling from a total of 297 patients with ER $\alpha$ -positive breast tumors was analyzed. (A), Down-regulated genes. (B) Up-regulated genes.

(C-D) Expression analysis of 26 DERE-regulated target genes involved in tamoxifen resistance. Quantitative RT-PCR analysis was performed on MCF-7 and BT474 cells treated with E2 (70 nM) and ER $\alpha$  antagonist, ICI-182-7820 (ICI, 1  $\mu$ M) in five time periods (0, 0.5, 1, 4, and 24 hr). (C) Up-regulated genes. (D) Down-regulated genes. Data were shown in 26 bar charts with individual genes (see also Figure 8C-D). Mean  $\pm$  SD (n=6). \*\*\*, p<0.001; \*\*, p<0.01; \*, p<0.05 (Student's *t* test), comparing to control cells (time point "0 hr").

## Supplemental Experimental Procedures

### Chromosome Conformation Capture Assay Coupled with Paired-end Sequencing (3C-seq)

MCF-7 cells were stimulated with E2 (70 nM) or DMSO (Ctrl) for 24 hr. The rationale of choosing this 24-hr time point for 3C-seq was based on our recent observation that progressive increases in the frequency of ER $\alpha$ -mediated looping might preferentially occur during the period of estrogen stimulation (Hsu et al., 2010). Two biological replicates of treated cells were then subjected to chromosome conformation capture assay as previously described (Hagège et al., 2007). Briefly, cells were fixed with 1% formaldehyde. Chromatin was digested with *Bam*HI, and then ligated by T4 DNA ligase in diluted conditions. Ligated DNA was then de-crosslinked, purified by phenol extraction procedures, and subjected to paired-end sequencing using the Illumina sequencing technology platform. Sample preparation for paired-end sequencing was performed following the manufacturer's instructions. Briefly, ligated DNA (5  $\mu$ g) was randomly sheared by a nebulizer supplied with the Illumina paired-end sample preparation kit. Fragmented DNA was end-paired using T4 DNA polymerase and Klenow polymerase with T4 polynucleotide kinase to phosphorylate the 5' ends. A 3' overhang was created using a 3'-5' exonuclease-deficient Klenow fragment, and Illumina paired-end adaptor oligonucleotides were ligated to the sticky ends thus created. The ligation mixtures were electrophoresed on E-gel<sup>®</sup> SizeSelect<sup>™</sup> 2% pre-cast agarose gels (Invitrogen) to collect 250-bp fragments. Size-selected DNA fragments were enriched with Illumina paired-end primers by a 12-cycle PCR reaction. DNA samples (20 nM per sample), quantified by an Agilent Bioanalyzer, were loaded



onto the paired-end flowcell of GAIIX in the supplied cluster station according to the manufacturer's protocol. Clusters of PCR colonies were then sequenced on GAIIX with 36-bp per read.

### **Mate-pair Sequencing**

Genomic DNA of untreated MCF-7 cells was subjected to mate-pair sequencing using the Illumina sequencing technology platform. We constructed mate-pair paired end libraries, prepared flowcells, and generated clusters following the manufacturer's instructions. Briefly, genomic DNA (10 µg) was randomly sheared by a nebulizer supplied with the Illumina mate-pair preparation kit. Fragmented DNA was end-paired using T4 DNA polymerase and Klenow polymerase, and 5' ends phosphorylated by T4 polynucleotide kinase. Biotinylated nucleotides were then incorporated to the repaired ends of the DNA. Biotin-labeled DNA was electrophoresed on E-gel<sup>®</sup> SizeSelect<sup>™</sup> 0.8% pre-cast agarose gels to collect 2.5- to 4.5-kb fragments and quantified by an Agilent Bioanalyzer. Size-selected DNA (600 ng) was circularized by circularization ligase supplied by the kit. Circularized DNA was randomly fragmented by a nebulizer and then end-repaired by kinases as mentioned above. A 3' overhang was created using a 3'-5' exonuclease-deficient Klenow fragment, and Illumina paired-end adaptor oligonucleotides were ligated to the sticky ends thus created. The ligation reactions were carried out on the biotinylated DNA immobilized to the streptavidin beads. Adaptor-modified DNA fragments were enriched by an 18-cycle PCR reaction with Illumina paired-end primers. DNA fragments (300-bp) were collected by E-gel<sup>®</sup> SizeSelect<sup>™</sup> 2% pre-cast agarose gels. DNA (20 nM per sample), quantified by an

Agilent Bioanalyzer, was subjected to the paired-end flowcell of GAIIX on the supplied cluster station. Clusters of PCR colonies were then sequenced on GAIIX with 51-bp per read.

### **Chromatin Immunoprecipitation Coupled with Single-end Sequencing (ChIP-seq)**

After culture in media containing charcoal-stripped serum for 24 hr, MCF-7 cells were stimulated with E2 for varying lengths of time (0, 0.5, 1, and 24 hr) and subjected to ChIP assays using ER $\alpha$  monoclonal antibody (sc-8005X, Santa Cruz Biotechnology). Immunoprecipitated DNA was then applied to single-end sequencing using the Illumina sequencing technology platform following the manufacturer's instructions. Briefly, ChIP DNA (10 ng, quantified by the Qubit<sup>TM</sup> quantitation platform) was end-paired using T4 DNA polymerase and Klenow polymerase with T4 polynucleotide kinase to phosphorylate the 5' ends. A 3' overhang was created using a 3'-5' exonuclease-deficient Klenow fragment, and Illumina single-end adaptor oligonucleotides were ligated to the sticky ends thus created. The ligation mixtures were electrophoresed on E-gel<sup>®</sup> SizeSelect<sup>TM</sup> 2% pre-cast agarose gels (Invitrogen) to collect 150-bp fragments. Size-selected DNA fragments were enriched with Illumina single-end primers by a 15-cycle PCR reaction. DNA samples (20 nM per sample; 2 lanes per sample) quantified by an Agilent Bioanalyzer were subjected to the single-end flowcell of GAIIX on the supplied cluster station. Clusters of PCR colonies were then sequenced on GAIIX with 51-bp per read. ER $\alpha$  ChIP-seq data were analyzed as previously described (Hsu et al., 2010).

## Genomic Mapping of Sequence Reads

Reads generated from the Illumina GAIx pipeline from mate-pair seq, ChIP-seq, and 3C-seq datasets were aligned to the Human Genome Assembly (NCBI build 36.1/hg18) using ELAND algorithm. Redundant tags were removed to reduce DNA amplification and system biases. Fragments with one/both end(s) uniquely mapped to the human genome were kept for further processing.

## Statistical Analyses of Next-generation Sequencing Data

Latent Class Poisson Regression Modeling. In addition to the biases presented in sequencing data (e.g., unequal efficiency of DNA amplification, copy number differences, existence of amplicon, sequencing bias, image processing, and matching errors), self- or random-ligation that also occurs during genomic library preparation also give rise to false-positive results. A latent class Poisson regression model was built to define true-positive genomic fusions and chromatin interactions (Wedel et al., 1993; Yang et al., 2005).

The proximate ligation and random ligation events were defined as two independent Poisson distributions. A latent class model with hidden variable showed the overall ligation event. Hence, the probability of  $Y_i$  from a particular class  $k$  is given by

$$f_k(y_i|\lambda_{i|k}) = \frac{e^{-\lambda_{i|k}}(\lambda_{i|k})^{y_i}}{y_i!}, \quad i = 1, \dots, n, k = 1, 2.$$

where  $\lambda_{i|k}$  is the mean rate of individual ligation event (denoted as  $\lambda$ ) in either proximate or random ligation class (denoted as  $k$ ), and  $n$  is the total number of ligation events.

The canonical log link function was then used to transform the mean of the Poisson

distribution to linear predictor  $\beta_k$  as

$$\ln(\lambda_{i|k}) = \beta_{0k} + \sum_{l=1}^L x_{il} \beta_{lk}$$

where  $x_{i1}, \dots, x_{iL}$  represents the explanatory variables. Expectation Maximization (EM) algorithm (Dempster et al., 1977; Wedel et al., 1993; Yang et al., 2005) was applied to estimate the unknown parameter  $\beta_k$  as well as  $\alpha_k$  which is the proportion of  $k$ th class in all ligation events with  $\sum_{k=1}^2 \alpha_k = 1$ ,  $0 < \alpha_k < 1$ . Given the threshold enrichment of fusion fragments as  $t$ , the false discovery rate (*FDR*) of proximate ligation could be estimated using the following formula,

$$FDR = \frac{\alpha_2[1 - F(t - 1, \lambda_2)]}{\alpha_1[1 - F(t - 1, \lambda_1)] + \alpha_2[1 - F(t - 1, \lambda_2)]}$$

where  $F(t - 1, \lambda)$  is the cumulative distribution function of the Poisson distribution.

### Identification of Translocation Fusion Fragments Based On Mate-Pair Sequencing Data.

The mixture Poisson regression model was utilized to reduce the false-discovery rate (*FDR*). Since the sequencing depth of the mate-pair sequencing dataset (34 lanes) is high, we set a higher threshold ( $t = 10$ ) to filter out randomly ligated fusions and define the fusion events with  $t \geq 10$  as positive translocation fusions. This criterion resulted in a *FDR* of close to 0 for identifying translocation fusions from the mate-pair sequencing dataset.

Another potential factor contributing to a *FDR* is mapping errors caused by translocations of small DNA elements, resulting in individual variations of DNA sequence. To increase the specificity on defining translocation fusion fragments, we

excluded all translocated fragments from small regions (<300bp). In contrast to the ordered orientation of tags derived from translocation breakpoints, the repetitive regions, especially centromeric regions, often show a random orientation of tags. Therefore, we removed all potential translocation fusion fragments with random orientation of tags to further reduce the *FDR*.

*Re-construction of 20q13-associated Derivative Chromosomes Harboring DERE-DERE Fusions.* Mate-pair sequencing data indicated that the 17q23::20q13 fusion was the most frequent event (Figure 2C), suggesting that complex rearrangements start from the formation of this translocation in MCF-7 cells. The probable sequence of multiple translocations was then reconstructed for the seven derivative chromosomes (T1 to T7), based on the assumption that these translocations were originally derived from a normal chromosome 20 through minimum steps of rearrangements including breaks, intra-/inter-chromosomal fusions, and amplification (Figure S2C-E). Moreover, structural fusions found in MCF-7 cells suggest that breaks, fusions and amplification are driving forces for this complex aberration.

*1) Determination of the orientation of “joint DNA”.* Structural fusion fragments identified by mate-pair sequencing were termed as “*joint DNA*”. Tags from sequencing results were used to determine the orientation of two joining DNA fragments. If two tags of a single joint DNA are mapped to a different strand (forward or reverse), this joint DNA has an identical orientation.

*2) Definition of “the chronological sequence” in amplification.* If a juncture of joint DNA caused by fusions or amplifications in the early steps is located in amplification-

susceptible regions, it may have multiple copies by subsequent amplifications in the MCF-7 genome. Based on the above assumption, we proposed that rearrangement events easily occurred in the aforementioned joint DNA to produce higher copies of the junctures in a certain genomic region. Therefore, “the chronological sequence” in rearrangements could be determined based on the copy numbers of the junctures.

Reproducibility, Saturation, and Sensitivity Tests of 3C-seq. 3C-seq was performed in two biological replicates to determine whether these datasets can reliably survey chromatin interaction events in a genome-wide scale. The interaction events were categorized into control (Ctrl) and treated (E2) in each replicate. Scatter plots were then conducted based on log<sub>2</sub> value of chromatin interaction events per Mb. The linear regression analysis was made using SigmaPlot 11. The entire genome was divided into bins 250-bp in length. Pairs of bins which contain two or more long-range (>1-kb or inter-chromosome) read-pairs were counted as positive chromatin interaction events and the maxima number of chromatin interaction events was estimated based on the above criterion. Oppositely, pairs of bin that contain only one long-range read-pair were considered as errors or random events. To examine whether our 3C-seq data provide sufficient sequencing depth for identifying chromatin interactions in a genome-wide scale, we tried to generate reduced-scale datasets by randomly extracting 5%, 10%, ... 95% data from all the read-pairs to investigate if the aforementioned criterion was applied in these reduced datasets. Each data scale was examined twice to increase the statistical confidence.

The entire genome was divided into ~3 million bins (100-bp in length). Pairs of bins

were further categorized into five groups based on the distance of the pairs: <1, 1-5, 5-10, >10-kb and inter-chromosome. We analyzed interactions of bin pairs for the four groups (1-5, 5-10, >10-kb, and inter-chromosome) separately. Specifically, for two bins A and B, we define the “frequency of interaction” as the count of sequence pairs such that one member of the pair overlaps with A and the other overlaps with B. We fitted a mix negative binomial model to the distributions of the count, and used the approach developed by Efron and his coworkers (Efron et al., 2001) to compute sensitivity and *FDR* associated with the detection criterion of  $\geq 2$  counts.

### *Identification of Significant Chromatin Interaction Events from 3C-Seq Data*

*1) Definition of inter- and intra-chromatin Interactions.* The aforementioned Poisson regression model was not able to eliminate self-ligation events, which possess spatial proximity on the two ends of a single DNA fragment. To further classify proximate ligation events based on the 3C-seq dataset, a high-stringent filtering criterion was applied. Briefly, a fusion fragment with two ends mapped to different chromosomes was defined as an inter-chromatin interaction fragment. If 1) the coordinates of the strand end from paired read #1 is larger than that of the strand end from paired read #2; 2) the distance between these two ends is less than 20-kb (Lieberman-Aiden et al, 2009), the fusion fragment was counted as a structural interaction. In addition, a non-self-ligated fusion fragment with both ends aligned to the same chromosome was classified as an intra-chromatin fusion fragment. Since the sequencing depth of the 3C-seq data is relatively lower (7 lanes per treatment, totally of 14 lanes) compared to the mate-pair sequencing dataset (a total of 34 lanes), we lowered the threshold  $t$  to 2 ( $FDR=8.35\%$ ).

If the numbers of fragments, which have two ends mapped to the same two loci exceed the threshold  $t$ , these two loci were defined as interactive loci.

2) *DERE-mediated chromatin interaction sites.* With integration of the ER $\alpha$  ChIP-seq and the 3C-seq datasets, we define an ER $\alpha$ -bound DERE-interacting locus as follows:

1) at least one DERE is located within 10-kb of an interactive site; 2) if an DERE is located between 10-kb upstream to the transcriptional start site (TSS) and the 3' end of a gene, the gene is considered to be regulated by ER $\alpha$ . Two main regions localized in 17q23 and 20q13 regions containing a high density of ER $\alpha$ -bound DEREs in response to estrogen stimulation were defined as DERE clusters. Their genomic characteristics were described in Table S8.

### **Fluorescence *In Situ* Hybridization (FISH)**

The probe mapped to the 20q13 region was prepared from a BAC (Invitrogen). The BAC clone was purified using a large-construct DNA kit (Qiagen) and labeled by nick translation using the Nick Translation kit (Vysis, Downer Groves, IL) following the manufacturer's recommendations. Briefly, 1  $\mu$ g of the BAC clone was conjugated with either SpectrumGreen- or SpectrumRed-labeled dUTP, co-precipitated with 10X (v/v) human Cot-1 (Invitrogen), and dissolved in Hybridization Buffer (Sigma). The reaction was carried out for 8 hr at 15 $^{\circ}$  C and stopped by heating the sample to 70 $^{\circ}$ C for 10 min.

Cells were harvested after mitotic arrest with 2 hr incubation of colcemid (1  $\mu$ g/mL, Invitrogen) for metaphase FISH. In metaphase and interphase FISH analyses, cells were hypotonized with a 0.075 M KCl buffer, fixed by cold Carnoy's fixative, and spread on pre-cleaned slides. Hybridization was performed according to standard cytogenetic



methods; metaphase images were captured by Zeiss fluorescence microscope (Zeiss Axioscope 40) and analyzed with the Applied Imaging System. Interphase images were captured by Olympus fluorescence microscope (Olympus BX53TF) and analyzed with CellSens Dimension Imaging System.

For three-dimensional interphase FISH (3D-FISH), treated MCF-7 cells were subjected to 3D-FISH according to the protocol published by Steinhäuser and coworkers (Steinhäuser et al., 2002). The entire 3D-FISH procedure was conducted in cell suspension. Briefly, fixation was done in cold Carnoy's fixative and 0.005% pepsin solution was used for digestion. Hybridization was performed overnight at 37°C with pre-hybridized labeled-probes (80 ng per sample) and slides were washed in 0.4x (68°C for 2 min) and 4x SSC (42°C for 2 min) respectively. Nuclei counterstained with DAPI (0.1 µg/mL) were placed on a polished concave slide with Vectashield Mounting Medium (Vector Laboratories, Burlingame, CA). An Olympus FV1000 confocal microscope using single interference filter sets for red (SpectrumRed), and blue (DAPI), as well as dual (red/blue) filters, was utilized to capture images. Since images contain background noise, the standard 3D median filtering implemented in MATLAB software was used for denoising. First, two image stacks in single color were generated from the original dual-color images. The standard 3D median filtering was then applied on the single-color image stack. The neighborhood window for the median filter was set to be 5\*5\*3 voxels. It is noticed that the window size of x and y axes was larger than that of z axis, but the anisotropy sampling resolutions in x, y and z directions were balanced. Denoised images were re-constructed using a free bioimage visualization toolkit, called V3D (<http://penglab.janelia.org/proj/v3d/V3D>).

## Reverse Transcription-quantitative PCR (RT-qPCR)

Total RNA (2 µg) was reversely transcribed to cDNA with oligo-dT (SuperScript III; Invitrogen). RT-qPCR was performed by using SYBR Green dye chemistry (Applied Biosystems) on a StepOnePlus™ Real-Time PCR System apparatus (Applied Biosystems). Gene expression was measured by the  $\Delta\Delta C_t$  method using  $\beta$ -actin as the internal control. Details of primer sequence for quantifications are provided in the following table.

| Name      | Forward                    | Reverse                  |
|-----------|----------------------------|--------------------------|
| AAA1      | TACCTCCCTTGCTGAACGTC       | CAGTGCTCCTGCACATGACT     |
| ADAM17    | CCTATTCCTGACCAGCGTG        | ACCGAATGCTGCTGGATATT     |
| ADARB2    | GAGGGCTGAGCAGTCAACTC       | TTTGTGATGCCAGGACTCAG     |
| AGAP1     | GCACGGCGCTGCATCT           | GCGTAGGCCAGAGCTGTGTT     |
| AJAP1     | TGCCCGTGTACACCGATGA        | CGAAGGCCACAGGAATAAGATG   |
| ALK       | CTTCCAGATCTTCGGGACTG       | TGCGATGAGACAGGAAAGG      |
| APLN      | CTGCTCTGGCTCTCCTTGAC       | CCATTCCTTGACCCTCTGG      |
| AP4E1     | CTCTGCAACAGAACTAAGACTCCATA | ACTCGGCAATGCAGTAAGCA     |
| ARHGAP10  | CCCTTTTCTCCTCCTGCTACTGT    | AGGTTCCCTGGAGGTTTGTACATC |
| ART4      | TGGGAACCTGAGCACATATAACTG   | CACTGGTCAAAAAGGAGAGAGATG |
| ARVCF     | AACTGGCAGCCGGGATGT         | GTCGAGTTTCAAGGGTTCCTTCTC |
| BBS4      | CAAGCTCTAGGACAGGCAATGTC    | GGGCTTTGTGAACTGGGATGT    |
| BRF1      | AGCGGGCCCGTGTGTCATA        | CATCGCCATCACAGCCATAG     |
| C16orf35  | ACAAGTAAGCCGCGTAGCAG       | TTTTGGCCACACATTTTCAAG    |
| C16orf65  | CTCATCAGGAAGGGGGCT         | TGGCATGGCCAACACTAAT      |
| C20orf51  | AAGCTGTCTTTCCATGGTGG       | TGAGAGTAAAATTCGCAATCA    |
| C8orf42   | CCTGACCATGTGGAAGCTG        | TTTCCAACCTCGGAACTTG      |
| C9orf80   | GGCAGCAAACCTTTCAGGAC       | AGGGTCTCGAGAGTGCAATG     |
| CSNK1E    | AGCTACGTGTGGGGAACAAG       | AGCTTGATGGCGACTTCT       |
| CTCFL     | GCAAATTTTCATCCCGACTGT      | TTCCCCTGATCCACACTTCT     |
| CTNND2    | CTCTTCCCGGACTGAGGAG        | GCTCAGGGAACCTCGTCTTCT    |
| DDX39     | AGCAAACGTCGTCTGAGCG        | CTGGGGCTCTTCTCTTCAT      |
| ECSIT     | GCCCAGCAACAAGACAGAG        | CTCCCCAGGCCCTACAGA       |
| EVPL      | CAAGGGGTCCCCCAAAG          | CTCTTCTGCGTCTCCAGGAT     |
| FOXM1     | ATAGCAAGCGAGTCCGCATT       | TCTCCTCTTTCCCTGGTCT      |
| GAS7      | AGCAAAAAGCAGAGCAAGGA       | CCTTGGGGGTCTTCTTATC      |
| GNG7      | AGGGAGTGGAGCTTGTTTT        | CCCGTTGTTTCAGAGAGCTTTT   |
| GPRC5C    | ACCCTTGAAGACAGCCATTG       | AGGAAGAGAGGCAGTCCCAG     |
| HBZ       | GGTGAAGAGCATCGACGACATC     | GCAGTGGGACAGGAGCTTGA     |
| HTF9C     | GATCTCTCCACACGCCTTCT       | ACAGCACACGTCCAGCAC       |
| INTS2     | GGTGCCTGGTTCTTGTGTCT       | AGCGTAAGGCATCTGTCTCTG    |
| LMNB2     | GGCTCCTGCTCAAGATCTCA       | CCAATCTCTATCTGCAGCCG     |
| LOC283514 | GCAACTTGTCTGTGTGTCGTC      | GAGAGATGGTGAGGGTGGAA     |
| MYH8      | TGCCTACAGAGGCAAAAAGC       | ATTCTCCGGTGATCAGGATG     |

(continued)

| Name           | Forward                 | Reverse                 |
|----------------|-------------------------|-------------------------|
| <i>NKX3-1</i>  | CAGAGCCAGAGCCAGAGG      | CAGATAAGACCCCAAGTGCC    |
| <i>NPHP4</i>   | CTTCCAGGAAACCACCCAC     | CAGCTGGGAAATTGACAACC    |
| <i>OSBPL1A</i> | GCCTTAATCTCTTCACCAAACAA | CGTCTCCAGTGCTTCTGACA    |
| <i>PACS2</i>   | ATGAACCTGTTGCGCCACCT    | TCCTTGAAGACCACCAGCTT    |
| <i>PLXNA3</i>  | AGCCAGCGGAGGGACAG       | ACCACGAAGGCACGGAAG      |
| <i>PRKACG</i>  | TATTCAGGCCAGGTCTTGCT    | TCCAAAGGGTAGGTGTGCTT    |
| <i>PRPF8</i>   | CGTGTGGACGATGAGTCAAT    | AGCCTCCCGAAAGTATGTCA    |
| <i>PRSS22</i>  | AACACCCACTGCTGGATCTC    | CTGCAGACTTCCGAGTCGAT    |
| <i>PTPRT</i>   | CCCTCAGCCTGCTCCTG       | AACCCATTGGTCCCTAGAGC    |
| <i>RGN</i>     | CCGTGGATGCCTTTGACTATG   | CCCCTCAGCATCAATACACATTC |
| <i>RNF24</i>   | GAGGGTGAGTCCCTCACAAA    | AGGCAGATTCTGGAATCCAAT   |
| <i>RNF6</i>    | GATGGCGTCAAGGAACAAC     | TTCGAGTTGCATTTCTGTG     |
| <i>SPO11</i>   | GGCTTGGTCTTCTCCCTTCT    | GGTTGGCAGGTAACATAAGGTC  |
| <i>STRN3</i>   | CCGGGGATACTGCACTACAT    | TGACCTTTTCTTTGCCTTG     |
| <i>TBC1D4</i>  | CAGCCACGACCTCACCTACT    | TGGCCGCTTTAGATAATTGC    |
| <i>TCEB1</i>   | GTGGCTGCGGGACTGAC       | CAATTTGACATACATGGCATCAG |
| <i>THRAP1</i>  | TCCTGGGATTTTGTGAAGC     | AAGATGGTGCCTGTCTTGT     |
| <i>TMCO3</i>   | AGGCGACATTGACTACAGCA    | CAGGATTCGGAGAACTTCCA    |
| <i>TNS3</i>    | CAGCATTTCTGTGTCTCCA     | CGTCCTCCTTTGTGTGACT     |
| <i>TRAP1</i>   | TTGGAAAACTGCGTCACAA     | CACCAGCTCTTCTGTGTCA     |
| <i>TRIM37</i>  | CCCCGGATGAAGATACACAT    | TTAACCATCAGGTGCAGTG     |
| <i>ZIM2</i>    | CAAAATGTGGTGGACCTCG     | AGGGACAGAGTCCTGAGCAA    |
| <i>ZMYND8</i>  | AGGAGACGTCAGCTGAGAAAAGC | AGCCTTGGTTGGAGCCTAAGAG  |
| <i>β-actin</i> | CAACTGGGACGACATGGAGA    | ACGTACATGGTGGGGTGTG     |

### Chromosome Conformation Capture-Quantitative PCR

Charcoal-stripped MCF-7 cells stimulated with E2 (70 nM) were collected at different time-points of treatment (0, 0.5, 1, 4, and 24 hr). Treated cells were then subjected to 3C-qPCR analyses as previously described (Hagège et al., 2007). Briefly, fixed chromatin by 1% formaldehyde was digested using *Bam*HI (for inter-chromosomal interactions) or *Hind*III (for intra-chromosomal interactions at *THRAP1*), and then ligated by T4 DNA ligase in a diluted condition. Ligated DNA was then de-crosslinked and purified by classical phenol extraction procedures. Real-time PCR was performed on a 7500 Real-Time PCR System apparatus using the TaqMan technology (QuantiTect Probe PCR Master Mix, Qiagen). We used a 5'FAM-3'BHQ1 oligonucleotidic probe

(Invitrogen). To rule out the possibility of false-negative looping occurrence caused by unsuccessful 3C assay, we pooled two human bacterial artificial clones (BAC), mapping the interested regions as the positive control of the 3C-qPCR assays. These BACs were also used to examine the primer efficiency. For data analysis, the Ct obtained for each chimerical ligation fragment was processed using parameters of a standard curve (slope and intercept) from BAC to obtain quantification values that were normalized to a *GAPDH* loading control. Details of primer and probe sequence for quantifications are provided in the following table.

| Name                | Sequence                           |
|---------------------|------------------------------------|
| <i>THRAP1-C1</i>    | GTTACCCACCCTTGACAGGAA              |
| <i>THRAP1-C2</i>    | GAAGGACACAGAACGGAGAGCTT            |
| <i>THRAP1-C3</i>    | AATTCAATTCACCTCCTGCAACTT           |
| <i>THRAP1_+52K</i>  | CGATCCTACACGGATATTTAGAGATGA        |
| <i>THRAP1_+48K</i>  | ATCGATCCTACACGGATATTTAGAGATG       |
| <i>THRAP1_+0.2K</i> | CGGACTGCGGATCCTTCTC                |
| <i>THRAP1_-2.9K</i> | GATCCTTCTCTCTGGGCCACTT             |
| <i>THRAP1-P1</i>    | TTCTTCTCCAAATGCAGCAGCTTCTA         |
| <i>THRAP1-P2</i>    | ACTACATAGTTCTATCTGATTCTAG          |
| <i>ZIM2-C1</i>      | AGGGTTTCATGAGGCATGTC               |
| <i>ZIM2-C2</i>      | CCCAAGGGATCCTCCTCTT                |
| <i>ZIM2-C3</i>      | GGGTTTCATGAGGCATGTCT               |
| <i>ZIM2_-1.7K</i>   | CCCAAGGGATCCTCCTCTT                |
| <i>ZIM2_-4.2K</i>   | GGGTTTCATGAGGCATGTCT               |
| <i>ZIM2_-4.4K</i>   | GCTATTGCTTTTTATACGCTGACT           |
| <i>ZIM2-P1</i>      | TTCCAAAGTCAACCCAAAAAATTAGTTTAGGCCA |
| <i>ZIM2-P2</i>      | TCTTGGCCGAGGACTTTCCAA              |

### Copy Number-Quantitative PCR (CN-qPCR)

Genomic DNA of 47 breast cancer cell lines and 5 immortalized cell lines was a generous gift from Dr. Joe Gray at the Lawrence Berkeley National Laboratory.

Additional DNA samples from breast tumors, breast epithelial progeny of E2-exposed breast progenitor cells, and treated MCF-7 cells were extracted by PureLink™ genomic DNA purification kit (Invitrogen) following the manufacturer's protocol. Quantitative PCR was performed to measure copy-number by using SYBR Green dye chemistry using a StepOnePlus™ Real-Time PCR System apparatus (Applied Biosystems). Copy-number of the 20q13 enhancer cluster was estimated by the  $\Delta\Delta CT$  method normalized to the internal control, diploid albumin gene. Details of primer and probe sequences are provided in the following table.

| Name         | Forward                  | Reverse                   |
|--------------|--------------------------|---------------------------|
| <i>17q23</i> | GGCCTGACACAGTGGCTCAT     | CTGGTCTTGAACCTCCTGACCTTGT |
| <i>20q13</i> | AAATCTCAATCTCCCTGCGCTAAG | CACACGAGGGCTGGGTTTC       |
| Albumin      | TTGTGGGCTGTAATCATCG      | TGCTGGTTCTCTTTCCTGAC      |

### Small Interfering RNA Transfections

MCF-7 cells ( $10^6$  cells) were seeded in a 10-cm dish and transfected the next day with small interfering RNA (siRNA) against ER $\alpha$  (SMARTpool siRNA, Dharmacon) using the Fugene HD transfection reagent (Roche) according to manufacturer's protocol. Culture media were switched to contain 5% charcoal-dextran serum. After 48 hr, the cells were treated with E2 (70 nM) in different time periods (0, 0.5, 1, 4, and 24 hr.). Scrambled oligonucleotide (Dharmacon) was used as a negative control.

### Foci Formation Assay

MCF-7 cells ( $10^6$  cells) were seeded in a 10-cm dish and transfected the next day with *THRAP1* (OriGene) and *ZIM2* (OriGene) plasmids using the Fugene HD transfection reagent (Roche) according to manufacturer's protocol. Vector plasmid was used as a

negative control. After 48 hours, transiently transfected cells (500 cells per dish) were re-seeded in 10-cm dish within culture media containing 5% charcoal-dextran serum, irrespective of E2 (70 nM) treatment. After 20 days, cells were fixed with 4% paraformaldehyde (Sigma) and stained by Gemisa solution (Sigma). Universal Hood II Image System (Bio-Rad) was used to capture images.

### PCR Method and Gel Electrophoresis for Detecting 17q23::20q13 Fusion

Genomic DNA from MCF-7 cells and 126 clinical breast tissues, including 106 primary tumors and 20 normal ones, was prepared using PureLink™ genomic DNA purification kit following the manufacturer's protocol. PrimeSTAR GXL DNA Polymerase (TaKaRa, Japan) was used for detection of the 17q23::20q13 fusion fragment in both clinical specimen and untreated MCF-7 samples. The following program was applied in a Veriti PCR system apparatus (Applied Biosystems) for 35 cycles: 98°C for 10s, 59 °C for 15s, and 68°C for 35s. Aliquots of the PCR reaction mix were electrophoretically separated in a 1.2% agarose gel in TBE buffer. The electrophoresis runtime was optimized to best distinguish fragments between 200 bp and 500 bp.

| Name            | Forward                | Reverse              |
|-----------------|------------------------|----------------------|
| <i>Fusion-1</i> | TCTAGGAGAGCATTCCGGTCAT | TGTGTCCCCCACAATCTCA  |
| <i>Fusion-2</i> | GGAGAGCATTCCGGTCATCA   | AGGATGTGTCCCCCACAATC |

### Supplemental References

Dempster, A.P., Laird, M.M., and Rubin, D.B. (1977). Maximum likelihood from incomplete data via the EM algorithm. *J. R. Stat. Soc. B.* 39, 1-38.

Efron, B., Tibshirani, R., Storey, J.D., and Tusher, V. (2001). Empirical Bayes analysis of a microarray experiment. *J. Am. Stat. Assoc.* 96, 1151-1160.

Lupien, M., Meyer, C.A., Bailey, S.T., Eeckhoute, J., Cook, J., Westerling, T., Zhang, X., Carroll, J.S., Rhodes, D.R., Liu, X.S., et al. (2010). Growth factor stimulation induces a distinct ER( $\alpha$ ) cistrome underlying breast cancer endocrine resistance. *Genes Dev.* 24, 2219-2227.

Steinhaeuser, U., Starke, H., Nietzel, A., Lindenau, J., Ullmann, P., Claussen, U., and Liehr, T. (2002). Suspension (S)-FISH, a new technique for interphase. *J. Histochem. Cytochem.* 50, 1697-1698.

Wedel, M., Desarbo, W.S., Bult, J.R., and Ramaswamy, V. (1993). A latent class Poisson regression model for heterogeneous count data. *J. App. Econometrics* 8, 397-411.

Yang, M., and Lai, C. (2005). Mixture Poisson regression models for heterogeneous count data based on latent and fuzzy class analysis. *Soft Comput.* 9, 519-524.
